1 **Evaluation of taxonomic classification and profiling methods for long-read shotgun**  
2 **metagenomic sequencing datasets**

3

4 Daniel M. Portik<sup>1\*</sup>, C. Titus Brown<sup>2</sup>, and N. Tessa Pierce-Ward<sup>2</sup>

5

6 1. Pacific Biosciences, 1305 O'Brien Dr, Menlo Park, California 93025 USA

7 2. Department of Population Health and Reproduction, University of California Davis, Davis,

8 California USA

9 \*Correspondence: [dportik@pacb.com](mailto:dportik@pacb.com)

10

11

12

13 **ABSTRACT**

14 **Background.** Long-read shotgun metagenomic sequencing is gaining in popularity and offers  
15 many advantages over short-read sequencing. The higher information content in long reads is  
16 useful for a variety of metagenomics analyses, including taxonomic classification and profiling.  
17 The development of long-read specific tools for taxonomic classification is accelerating, yet  
18 there is a lack of information regarding their relative performance. Here, we perform a critical  
19 benchmarking study using 11 methods, including five methods designed specifically for long  
20 reads. We applied these tools to several mock community datasets generated using Pacific  
21 Biosciences (PacBio) HiFi or Oxford Nanopore Technology (ONT) sequencing, and evaluated  
22 their performance based on read utilization, detection metrics, and relative abundance estimates.

23

24 **Results.** Our results show that long-read classifiers generally performed best. Several short-read  
25 classification and profiling methods produced many false positives (particularly at lower  
26 abundances), required heavy filtering to achieve acceptable precision (at the cost of reduced  
27 recall), and produced inaccurate abundance estimates. By contrast, two long-read methods  
28 (BugSeq, MEGAN-LR & DIAMOND) and one generalized method (sourmash) displayed high  
29 precision and recall without any filtering required. Furthermore, in the PacBio HiFi datasets  
30 these methods detected all species down to the 0.1% abundance level with high precision. Some  
31 long-read methods, such as MetaMaps and MMseqs2, required moderate filtering to reduce false  
32 positives to resemble the precision and recall of the top-performing methods. We found read  
33 quality affected performance for methods relying on protein prediction or exact k-mer matching,  
34 and these methods performed better with PacBio HiFi datasets. We also found that long-read  
35 datasets with a large proportion of shorter reads (<2kb length) resulted in lower precision and

36 worse abundance estimates, relative to length-filtered datasets. Finally, for classification  
37 methods, we found that the long-read datasets produced significantly better results than short-  
38 read datasets, demonstrating clear advantages for long-read metagenomic sequencing.

39

40 **Conclusions.** Our critical assessment of available methods provides best-practice  
41 recommendations for current research using long reads and establishes a baseline for future  
42 benchmarking studies.

43

44 **Keywords.** metagenomics, taxonomic classifier, taxonomic profiler, long reads, PacBio,  
45 Nanopore, mock community, benchmarking, sourmash

46

47

## 48 **INTRODUCTION**

49 The identification of microbial species in environmental communities is an essential task in  
50 microbiology. Shotgun metagenomic sequencing (or metagenomics) can provide relatively  
51 unbiased sampling of the species in such communities, which can include bacteria, archaea,  
52 viruses, and eukaryotes. Whereas selective amplification (e.g., 16S, ITS) targets specific gene  
53 regions, the goal of metagenomics is to sequence complete genomic DNA for all species in a  
54 sample. Consequently, the set of tools used to predict the identities and relative abundances of  
55 microbial species differs greatly between these approaches. In particular, the difficulty of  
56 performing this task for complex shotgun sequencing data has led to the development of many  
57 taxonomic profiling methods, particularly for second-generation/short-read technologies  
58 (reviewed in [1]). The rapid expansion of short-read taxonomic classification and profiling tools

59 led to recognition of the importance of methods comparisons, benchmarking, and standardized  
60 test datasets [1-10]. These benchmarking studies have been critical for understanding the relative  
61 performance of taxonomic profiling methods for different use-cases, which can vary greatly  
62 among microbiologists.

63         Though much of metagenomics has focused on short-read sequencing, there is rising  
64 awareness of the new opportunities offered by third-generation sequencing technologies which  
65 produce longer sequencing reads. Whereas short reads typically contain a single gene fragment,  
66 long reads often span multiple genes and intergenic regions which can be used for alignment  
67 algorithms and sequence matching. Among the most popular long-read sequencing platforms are  
68 those produced by Pacific Biosciences (PacBio) and Oxford Nanopore Technologies (ONT).  
69 While long reads have historically been accompanied by higher error rates, continual  
70 improvements in library preparation, sequencing chemistries and post-processing have  
71 dramatically reduced the error rates associated with longer reads. For example, the most recent  
72 combination of ONT “Q20” chemistry and the Bonito basecaller (v0.3.5+) is reported to produce  
73 modal read accuracies of 99% (~Q20), and the development of PacBio HiFi sequencing allows  
74 for highly accurate consensus reads (>Q20, median Q30) that are 10–20 kb in length [11]. As a  
75 result of these improvements, both PacBio HiFi and ONT long reads offer new potential for  
76 metagenomic analyses, including metagenome assembly, functional annotation, and taxonomic  
77 profiling.

78         Until recently, few studies have evaluated the performance of taxonomic classification  
79 and profiling methods for long reads, in part because few tailored methods were available.  
80 However, the rate of development for long-read taxonomic classification methods appears to be  
81 increasing. For example, MetaMaps [12] and MEGAN-LR [13] were among the first long-read

82 methods, and they became available over the course of several years. By contrast, multiple  
83 methods have appeared in the beginning of 2021, including MMseqs2 taxonomy [14] and  
84 BugSeq [15]. Prior long-read benchmarking studies applied short-read methods to long reads [3,  
85 16] or compared the potential of long reads to short reads [17], yet only one study has included a  
86 comparison of long-read methods [18]. Given the dramatic decreases in long read error rates and  
87 the proliferation of long read classification methods, there is a pressing need to assess the  
88 performance of taxonomic profiling using long reads.

89         Here, we perform a critical benchmarking study to evaluate the performance of  
90 taxonomic classification and profiling methods for long-read datasets. We evaluate 11 methods,  
91 including five methods designed for long reads. We include both taxonomic classifiers and  
92 taxonomic profilers in our study. Taxonomic sequence classifiers are used to classify all input  
93 reads by aligning or matching the information content in reads to databases consisting of  
94 comprehensive nucleotide, protein, or whole genome datasets. The resulting matches or  
95 alignments are interpreted to provide taxonomic annotations per reads. When aggregated, the  
96 per-read classifications can be used to produce a taxonomic profile with relative abundance  
97 estimates (often based on read counts). We note that classifiers can also be used with contigs  
98 (versus reads), and this approach is generally referred to as taxonomic binning. However,  
99 taxonomic binning precludes relative abundance estimation unless additional steps are included.  
100 By contrast, taxonomic profilers are not intended to classify all input reads. Rather, they are  
101 designed to output a taxonomic profile with relative abundance estimates. Several profilers rely  
102 on smaller marker-specific databases, with contents selected to represent the unique signatures of  
103 species. For these marker-based profiling methods, it is expected that only a subset of reads will  
104 map successfully. However, profiling methods are not inherently restricted to marker-specific

105 databases, and some methods can use comprehensive databases (see Materials and Methods). We  
106 also note that some methods may not be easily categorized as a classifier or profiler. Finally, we  
107 distinguish long-read methods from short-read methods as those which utilize the long-range  
108 information contained across a long read (often using multiple genes for classification).

109 We propose the ideal taxonomic classifier and profiler should display high precision and  
110 recall (e.g., low numbers of false positives and false negatives), and accurately estimate the  
111 relative abundances of taxa [1, 3-4, 7-10]. Furthermore, taxonomic classifiers should ideally  
112 assign all assignable reads (e.g., those with database representation). Given the design of marker-  
113 based profiling methods, read assignment is not as relevant as a metric of performance. We  
114 evaluate the relative performance of methods based on these criteria, using publicly available  
115 datasets. These datasets are generated from mock communities of known compositions, which  
116 were sequenced using PacBio HiFi or ONT. Mock communities are considered simplistic  
117 relative to environmental samples, but they allow a clear assessment of detection metrics (such  
118 as precision, recall, and F-scores) and are therefore highly informative for benchmarking. In  
119 order to tease apart the impacts of error profile and read length on performance, we also include  
120 comparisons using Illumina short-read datasets for two of the mock communities. Our main  
121 goals are to 1) identify which methods perform best for long-read datasets, 2) understand if long  
122 reads provide more accurate taxonomic profiles or abundance estimates relative to short reads,  
123 and 3) identify if differences in long read quality have any effects on performance. Overall, we  
124 provide a baseline assessment of available methods using reproducible analyses, which can  
125 inform current research and establish a foundation for future benchmarking studies.

126

127 **MATERIALS AND METHODS**

128

## 129 **Mock Community Datasets**

130 We obtained two PacBio HiFi datasets and two ONT datasets from publicly available sources.

131 We chose empirical datasets versus simulated datasets because simulations do not capture true

132 variation in error profiles, read length heterogeneity, and the effects of DNA extraction, library

133 preparation, and sequencing. Furthermore, pseudo-mock communities (e.g., those created from

134 multiple isolate sequencing datasets) may combine older and newer sequencing

135 chemistries/platforms for a given technology, creating additional confounding effects.

136 The two PacBio datasets are available on NCBI (Table 1). The first PacBio HiFi dataset

137 is for the ATCC MSA-1003 mock community (PRJNA546278: SRX6095783, released June

138 2019). The ATCC MSA-1003 mock community contains 20 bacteria species in staggered

139 abundances (5 species at 18%, 1.8%, 0.18% and 0.02% abundance levels, respectively). The

140 PacBio ATCC dataset was generated using the Sequel II System and contains 2.4 million HiFi

141 reads with a median length of 8.3 kb, for a total of 20.54 Gb of data (Fig. 1, Table 1). We refer to

142 this dataset as HiFi ATCC MSA-1003. The second PacBio HiFi dataset is for the

143 ZymoBIOMICS Gut Microbiome Standard D6331 (PRJNA680590: SRX9569057, released

144 November 2020). The Zymo D6331 mock community contains 17 species (including 14 bacteria,

145 1 archaea, and 2 yeasts) in staggered abundances. Five species occur at 14% abundance, four at

146 6%, four at 1.5%, and one species per 0.1%, 0.01%, 0.001%, and 0.0001% abundance level.

147 There are five strains of *E. coli* contained in this community (each at 2.8% abundance), which

148 we treat here as one species at 14% abundance. The PacBio Zymo D6331 dataset was generated

149 using the Sequel II System and contains 1.9 million HiFi reads with a median length of 8.1 kb,

150 for a total of 17.99 Gb of data (Fig. 1, Table 1). We refer to this dataset as HiFi Zymo D6331.

151 We obtained two ONT datasets for the ZymoBIOMICS D6300 microbial community  
152 standard. The Zymo D6300 standard is simpler in design and contains 10 species in even  
153 abundances, including 8 bacteria at 12% abundance and two yeasts at 2% abundance. The two  
154 ONT datasets contained a broader distribution of read lengths which included a large tail of  
155 shorter reads (<2kb in length). Our initial work indicated these shorter reads may have an  
156 adverse effect on taxonomic profiling, a result also supported by [19]. We therefore included two  
157 variations of each ONT dataset. The primary datasets are the focus of our methods comparison  
158 and resulted from length filtering to remove all short reads (<2kb) and ultra-long reads (>50kb).  
159 We found ultra-long reads caused compatibility issues with some taxonomic profiling programs  
160 (particularly the short-read methods). To investigate the potential effects of shorter reads, we  
161 created secondary datasets which contained a large proportion of shorter long reads. The first  
162 ONT dataset comes from a continually updated resource produced by [20]. We downloaded the  
163 R10.3 chemistry data release (February 2020) which was produced from two flowcells on an  
164 ONT GridION, resulting in 1.16 million reads (4.64 Gb data). We used NanoFilt [21] to remove  
165 all short (<2kb) and ultra-long reads (>50kb). Length-filtering resulted in the removal of 873,079  
166 short reads and 12,129 ultra-long reads (1.33 Gb total; 75% and 0.01% of total reads,  
167 respectively), and the retention of 275,318 ONT reads (23% of total reads). The resulting length  
168 filtered ONT reads have a median length of 6.6 kb, for a total of 3.31 Gb of data (Fig. 1, Table  
169 1). We refer to this primary dataset as ONT R10 Zymo D6300. The secondary version of this  
170 dataset uses all reads <50kb in length. It contains 3.86 Gb data (1,148,397 reads) with a median  
171 read length of 660 bp and mean read length of 3.3 kb, and is referred to as ONT R10 Short  
172 (Supplementary Figure S1). The second ONT dataset was obtained from the European  
173 Nucleotide Archive (PRJEB43406: ERR5396170, released March 2021) and represents the ‘Q20



174 chemistry' release for the Zymo D6300 standard (described at:  
175 [https://github.com/Kirk3gaard/2020-05-20\\_ZymoMock\\_Q20EA](https://github.com/Kirk3gaard/2020-05-20_ZymoMock_Q20EA)). It was generated using a  
176 PromethION, resulting in 5.4 million reads (17.95 Gb data). We again used NanoFilt to remove  
177 short reads (<2 kb) and ultra-long reads (>50 kb), which resulted in the elimination of 2.13  
178 million (39%) and 819 (<0.001%) of the total reads, respectively. From the remaining ~3.2  
179 million reads, we subsampled to obtain 2 million reads (a number comparable to the HiFi  
180 datasets). This produced a length filtered ONT dataset of 2 million reads with a median length of  
181 4.2 kb, for a total of 9.6 Gb of data (Fig. 1, Table 1). We refer to this primary dataset as ONT  
182 Q20 Zymo D6300. The secondary version of this dataset contains a comparable number of  
183 shorter long reads. We used NanoFilt to remove all reads >3kb in length and subsampled the  
184 remaining reads to obtain 2 million reads. We refer to this as ONT Q20 Short, and this dataset  
185 contains 2.72 Gb data with a median read length of 1.2 kb and mean read length of 1.3 kb  
186 (Supplementary Figure S1). The read names required to reconstitute the ONT R10 Zymo D6300  
187 and ONT Q20 Zymo D6300 datasets are available on the Open Science Framework project page  
188 for this paper (<https://osf.io/bqtdu/>).

189 As a final comparison to the long-read datasets, we included short-read sequence data for  
190 two of the mock communities (Table 1). We downloaded Illumina sequence data for ATCC  
191 MSA-1003 (PRJNA510527: SRX5169925, released December 2018), which included a total of  
192 ~10 million 150 bp paired-end reads produced by a HiSeq2500 (but available pre-trimmed to 125  
193 bp). We also obtained Illumina sequence data for the Zymo D6300 community (PRJNA648136:  
194 SRX8824472, released July 2020). These data were produced using a NovaSeq 6000 and include  
195 ~100 million 150bp PE reads. Given the large difference in read numbers between these datasets,  
196 we subsampled the Zymo Illumina data to obtain 20 million total reads. We refer to these

197 datasets as Illumina ATCC MSA-1003 and Illumina Zymo D6300, respectively. A variety of  
198 factors, including different DNA extraction methods, can affect the final composition of DNA  
199 sequenced for metagenomic samples and potentially bias relative abundance estimates [21].  
200 Additionally, variation in error profiles across sequencing technologies could also cause potential  
201 differences in results. To control for these potential confounding effects in the Illumina datasets,  
202 we also “simulated” short-read data from our long-read datasets. Each long read was divided into  
203 150 bp non-overlapping segments, and 10 segments were randomly selected to create a  
204 “simulated” short-read dataset. We chose this subsampling strategy (versus retaining all available  
205 segments) to create a consistent number of short reads per long read, which varied in length. This  
206 strategy generated ~21 million 150 bp “reads” from the HiFi ATCC MSA-1003 dataset, and 20  
207 million 150 bp “reads” from the ONT Q20 Zymo D6300 dataset. We refer to these datasets as  
208 SR-Sim ATCC MSA-1003 and SR-Sim ZymoD6300, respectively.

209

210

## 211 **Taxonomic Classification and Profiling Methods**

212 We evaluated the performance of 11 methods on the long-read mock community datasets.  
213 We included five methods developed specifically for long reads, five popular short-read  
214 methods, and one generalized method (Table 2), which we summarize here. We ran all methods  
215 for the primary long-read datasets and secondary ONT datasets, and used only short-read  
216 methods for the short-read datasets.

217 The short-read methods include Kraken2 [23-24], Bracken [25], Centrifuge [26],  
218 MetaPhlan3 [27], and mOTUs2 [28]. Among these methods, Kraken2 and Centrifuge are  
219 taxonomic sequence classifiers, Bracken is a type of taxonomic profiler, and MetaPhlan3 and

220 mOTUs2 are both marker-based taxonomic profilers. Kraken2 is a k-mer-based read classifier,  
221 which is often paired with Bracken for profiling. Following Kraken2 analyses, Bracken is used  
222 for Bayesian re-estimation of abundances. Centrifuge uses a Burrows-Wheeler transform and  
223 Ferragina-Manzini index for storing and mapping sequences. We include two variations of  
224 Centrifuge analyses, one using the default settings suitable for short reads (referred to as  
225 Centrifuge-h22), and another with settings for long reads (referred to as Centrifuge-h500; see  
226 details below). MetaPhlan3 uses coverage scores to calculate the relative abundances of taxa,  
227 based on read mapping to a unique clade-specific marker database. Similarly, mOTUs2 maps  
228 reads to a unique marker specific database. Specifically, it uses a database composed of single  
229 copy phylogenetic marker genes for operational taxonomic units (mOTUs). Recently, a “long  
230 read” option was introduced for mOTUs2, which divides each long read into multiple short read  
231 segments (highly similar to our SR-Sim datasets) and uses these outputs to run the typical short  
232 read workflow. We used the “long read” option for our analyses as recommended by the authors,  
233 but note that it should not be considered a true long-read method. The resulting artificial short  
234 read datasets contained 25–35x more reads than the initial long read datasets.

235       The long-read methods include MetaMaps [12], MEGAN-LR [13, 29], MMseqs2 [14],  
236 and BugSeq [15]. All long-read methods described here are considered taxonomic sequence  
237 classifiers. MetaMaps was among the first methods designed specifically for long reads, and it  
238 uses approximate mapping with probabilistic scoring to estimate sample composition. MEGAN-  
239 LR was developed from MEGAN6 and was designed to interpret translation alignments of long  
240 nucleotide sequences to a protein reference database. These alignments can be made using any  
241 program capable of translation alignment (e.g., blastx mode), but here we specifically use  
242 DIAMOND [30] due to its favorable long-read options (e.g., range-culling and frameshift-aware

243 alignment; [31]). MEGAN-LR assigns reads to taxa using a novel interval-union lowest common  
244 ancestor (LCA) algorithm, in combination with other relevant features (e.g., `lcaCoveragePercent`,  
245 `minSupportPercent`, `minPercentReadCover`). MEGAN-LR can likewise interpret alignments to  
246 nucleotide databases using similar options, such as those created with `minimap2` [32]. For this  
247 experiment, we created alignments based on protein references (using DIAMOND) and  
248 nucleotide references (using `minimap2`), and subsequently used MEGAN-LR for taxonomic  
249 classification. To distinguish between these methods, we refer to them as MEGAN-LR-prot and  
250 MEGAN-LR-nuc. Furthermore, we tested settings in `minimap2` that were specific to HiFi or  
251 ONT data (see below) and ran both settings on all mock communities. We refer to these analyses  
252 as MEGAN-LR-nuc-HiFi and MEGAN-LR-nuc-ONT. Thus, we include three analyses that  
253 involve MEGAN-LR: MEGAN-LR-prot, MEGAN-LR-nuc-HiFi, and MEGAN-LR-nuc-ONT.  
254 We note that MEGAN-LR-prot is unique from all other methods in that it also simultaneously  
255 assigns functional annotations to genes on reads, providing a taxonomic and functional profile  
256 for a sample. The `MMseqs2` taxonomy tool extracts all possible protein fragments in six frames  
257 from the long reads, pre-filters the protein sequences, aligns the retained protein sequences to the  
258 reference protein database, and ultimately assigns reads to taxa using a novel LCA algorithm  
259 (“approximate 2bLCA”). The published BugSeq algorithm (V1) performs `minimap2` alignments  
260 using a nucleotide database, followed by Bayesian reassignment and LCA identification [15].  
261 Following initial development, a BugSeq V2 method was developed which includes `minimap2`  
262 alignment of sequences to a nucleotide database followed by LCA identification and abundance  
263 calculation (S. Chorlton, personal communication). BugSeq V2 performs better for longer reads  
264 (>1kb), higher sequencing depth, and shotgun metagenomics (vs. cDNA sequencing

265 experiments). An auto-detect feature selects the V1 or V2 version based on the dataset uploaded  
266 to the online platform, and in our experiment BugSeq V2 was selected for all long-read datasets.

267         In addition to methods which are generalized to short or long reads, we also ran sourmash  
268 [33, 34], which is a k-mer-based sequence analysis tool that can be used for taxonomic profiling.  
269 Sourmash uses a fractional scaling ('FracMinHash') approach to representatively subsample both  
270 metagenome and reference datasets in a way that supports accurate sequence similarity  
271 comparisons [35]; this allows rapid search of large databases. Sourmash can be used with any  
272 type of sequencing data, but its taxonomic profiling (sourmash gather + sourmash taxonomy) has  
273 thus far been primarily applied to short reads datasets. Sourmash profiling differs from the k-mer  
274 methods above in that it uses combinatorial observations of k-mers to find the minimum set of  
275 reference genomes that cover all information (k-mers) in the metagenome query, and then  
276 aggregates the taxonomic information from these genomes using an LCA approach [35]. Long  
277 nucleotide k-mer exact matching is more stringent than alignment-approaches, with stringency  
278 increasing as k-mer length increases. As a result, long k-mer searches may miss some reference  
279 matches if sufficient nucleotide divergence exists between the metagenome sequence and the  
280 strain available in the reference database [36]. Sourmash uses a k-mer length of 31 for species-  
281 level matching (default), and suggests 51 for strain-level resolution; we test both here. We use  
282 the default fractional scaling (1/1000) for all analyses.

283         A standardized output format was required to facilitate comparisons of the results across  
284 methods. We selected kraken-report (kreport) format because it contains cumulative counts and  
285 level counts across the complete hierarchical taxonomy for each taxon assigned. The level count  
286 is the number of reads specifically assigned to a taxon, whereas the cumulative count is the sum  
287 of the level counts for a taxon plus its descendants. For example, the cumulative count of a genus

288 is the level count for that genus plus the level counts of all species and strains contained in that  
289 genus. This output format is readily available for Kraken2, Bracken, MMseqs2, and BugSeq. We  
290 created conversion tools for all other methods (MetaPhlan3, MetaMaps, MEGAN-LR), which  
291 are available on github: <https://github.com/PacificBiosciences/pb-metagenomics-tools>. The  
292 kreport output format was recently added to sourmash and is available in sourmash v4.5.1.

293

## 294 **Comparative Analyses**

295 We evaluated method performance using several criteria. We assessed read utilization, detection  
296 metrics at the species and genus level, and relative abundance estimates. We provide details for  
297 each of these categories below.

298

299 *Read Utilization.* We evaluated read utilization for each profiling method in two ways. First, we  
300 simply calculated the total percent of reads that received a taxonomic assignment. For sourmash,  
301 we use the total percent of the dataset with an assignment, as it does not assign taxonomy to  
302 specific reads. Second, we calculated the percentage of reads (dataset) that were assigned to  
303 specific taxonomic levels. We performed this for the following ranks: class, order, family, genus,  
304 species, and subspecies/strain. Values were obtained by summing the level counts of all taxa  
305 within a given rank. In general, we expected methods that utilize LCA algorithms to display read  
306 assignments across multiple taxonomic levels, relative to methods that do not. The exception is  
307 sourmash, which makes non-overlapping k-mer assignments to specific genomes (~strain level)  
308 and only uses LCA to aggregate genome matches to higher taxonomic ranks. We expected  
309 marker-based profilers (MetaPhlan3, mOTUs2) to display relatively low read assignments, and  
310 mainly used read utilization to evaluate performance among the remaining methods.

311  
312 *Detection Metrics.* The species compositions of the mock communities are known, allowing for a  
313 complete evaluation of detection metrics. For each profiling method, we scored the  
314 presence/absence of a taxon based on whether or not the cumulative read count for that taxon  
315 exceeded a minimum percent threshold of the total reads. We used a minimum percent threshold  
316 (versus a fixed number of reads) because our datasets contained different numbers of total reads.  
317 We recognize that setting a minimum detection threshold in this way penalizes methods that  
318 assign a smaller proportion of the total reads available. However, setting a threshold based on the  
319 number of reads assigned in a given analysis could produce misleading results (for example, a  
320 method could assign only 10% of total reads but achieve perfect precision). We evaluated three  
321 minimum read thresholds, including 0.001% (mild filtering, mainly for removing singleton count  
322 taxa for short-read methods), 0.1% (moderate filtering), and 1% (heavy filtering) of the total  
323 number of reads per dataset (Table 3). The threshold filtering was mainly used to explore the  
324 effects on precision (particularly the impact on false positives) across the four primary datasets.  
325 However, we also used filtering to investigate the effects on the staggered abundance  
326 communities (ATCC MSA-1003 and Zymo D6331). These two mock communities contained  
327 several taxa in low abundances, and we explored how filtering might cause detection dropout for  
328 different abundance levels. We performed our evaluations at the species level and the genus  
329 level. We expected detection to be more difficult at the species level and easier at the genus  
330 level. This is because assignments to multiple non-target species within a genus would be  
331 considered incorrect at the species level, but correct at the genus level.

332         We calculated several detection metrics (precision, recall, F-scores) which are based on  
333 the number of true positives, false positives, and false negatives. In this context, we define a true

334 positive as the detection of a mock community taxon (based on a read count exceeding the  
335 minimum read threshold). We define a false positive as the detection of taxon that is not present  
336 in the mock community. We define a false negative as the failure to detect a taxon in the mock  
337 community (based on a zero count or count below the minimum threshold). The formulas for  
338 precision, recall and F-scores are as follows:

339 **Precision** = true positives / (true positives + false positives)

340 **Recall** = true positives / (true positives + false negatives)

341  $F_1 = (2 * \text{precision} * \text{recall}) / (\text{precision} + \text{recall})$

342  $F_{0.5} = ((1 + 0.5^2) * \text{precision} * \text{recall}) / ((0.5^2 * \text{precision}) + \text{recall})$

343 The values for the above metrics each range from 0 to 1. For precision, a score of 1 indicates  
344 only mock community taxa were detected, whereas lower scores indicate detection of additional  
345 taxa (e.g., false positives). For recall, a score of 1 indicates all taxa in the mock community were  
346 detected, whereas a lower score indicates some taxa were not detected. The F-scores provide a  
347 useful way to summarize the information from precision and recall. The  $F_1$  score is the harmonic  
348 mean of precision and recall (both measures are weighted equally), whereas the  $F_{0.5}$  score gives  
349 more weight to precision (placing more importance on minimizing false positives). A value of 1  
350 for either F-score indicates perfect precision and recall.

351 We controlled for two issues that can negatively impact these metrics. First, we observed  
352 and accounted for differences in taxonomy, particularly as it relates to synonymies. In the case of  
353 a species synonymy, we used the sum of cumulative counts for the species and all synonyms as  
354 the read count for the taxon. This included two species in ATCC MSA-1003 (*Luteovulum*  
355 *sphaeroides* = *Rhodobacter sphaeroides*, *Cereibacter sphaeroides*; *Phocaeicola vulgatus* =  
356 *Bacteroides vulgatus*), one species in Zymo D6300 (*Limosilactobacillus fermentum* =



357 *Lactobacillus fermentum*), and three species in Zymo D6331 (*Limosilactobacillus fermentum* =  
358 *Lactobacillus fermentum*; *Bacillus subtilis* = *Bacillus spizizenii*; *Faecalibacterium* sp. AF28-  
359 I3AC = *Faecalibacterium prausnitzii*). Most of these synonymies are related to changes in  
360 taxonomy, but for *Faecalibacterium prausnitzii* we observed that *Faecalibacterium* sp. AF28-  
361 I3AC contained a genome sequence identical to *F. prausnitzii* in the NCBI database. Second, we  
362 observed that sequences and/or taxonomy information was lacking for two species (Zymo  
363 D6331: *Veillonella rogosae*, *Prevotella corporis*) in multiple databases (“PlusPF”, Refseq  
364 ABVF, MiniSeq+H, NCBI nt). To remedy this issue, we excluded the two species from the set of  
365 taxa used to calculate detection metrics at the species-level for all methods. However, we  
366 observed that many reads were assigned to alternate species in the same genus, so we included  
367 the two genera in the genus-level analysis.

368         We calculated detection metrics for each dataset. To understand the performance of each  
369 method across all datasets, we took an average of precision, recall,  $F_1$  and  $F_{0.5}$ . We also took the  
370 average of these values for the HiFi datasets and ONT datasets separately, to see if any methods  
371 performed differently across the technologies.

372  
373 *Relative abundance estimates.* We attempted to obtain relative abundances for each method, but  
374 acknowledge several potential issues. First, there are clear differences in intended outputs among  
375 methods. For example, profiling methods provide taxonomic abundances whereas classifiers  
376 provide sequence abundances (which must be transformed into taxonomic abundances). Second,  
377 the read counts obtained from classifiers do not account for the length heterogeneity of reads in  
378 long read datasets, and counts are not weighted by total base pairs. Although some methods offer  
379 this type of correction (MEGAN-LR), it is not available across all methods and difficult to

380 implement. Third, DNA extraction methods can affect the final composition of DNA sequenced  
381 for metagenomic samples [21], which could lead to systematically skewed abundance estimates.  
382 Despite these caveats, relative abundances are of interest to the research community and are  
383 therefore included here.

384 We used the read counts output directly from Kraken, Bracken, Centrifuge, mOTUs2,  
385 MetaMaps, MMSeqs2, all MEGAN-LR methods, and BugSeq. The output of sourmash is  
386 abundance-projected base pair estimates, which is a projection of the number of base pairs that  
387 the percent of matched k-mers represents. To estimate the “read counts” for this method, we  
388 obtained a total from the base pair estimates across species plus all unassigned base pairs, and  
389 divided the base pair estimates from all species by this total. For MetaPhlAn3, we multiplied the  
390 percent abundance of each taxon by the total number of mapped reads. We note that for  
391 mOTUs2, the read counts are based on the artificial short reads generated, and not the initial long  
392 reads. These numbers therefore represent an overestimate. However, given the low read counts  
393 recovered using this method (<1%; see Results), we did not attempt to transform these read  
394 counts.

395 Relative abundances were estimated for each profiling method at the species and genus  
396 level. We obtained cumulative counts for the mock community species or genera and the sum of  
397 cumulative counts for all false positives at the species or genus level (classified as “Other”).  
398 These data were normalized to obtain the percent abundance of each taxon. We corrected for the  
399 absence of two species from multiple databases (*Veillonella rogosae*, *Prevotella corporis*) in  
400 HiFi Zymo D6331. For methods affected by these databases, we observed many reads were  
401 assigned to other species in these two genera. Rather than scoring these as “Other”, we allowed  
402 all species-level assignments within these genera to contribute to the read counts for these two

403 species. To be consistent, we allowed this for all methods for HiFi Zymo D6331. In other words,  
404 genus-level counts for *Veillonella rogosae* and *Prevotella corporis* were used for the species  
405 abundances, rather than exclude these two taxa.

406 For each method, we calculated an L1 distance (following [9]) and performed a chi-  
407 squared goodness of fit test to determine if the estimated abundances were significantly different  
408 from the theoretical abundances. The theoretical abundances were obtained from the  
409 manufacturer's specifications, which are based on genomic DNA (versus cell counts). We  
410 calculated L1 distance by summing the absolute error between the theoretical and empirical  
411 estimate per species per community. We included the false positives lumped in the "Other"  
412 category in this calculation and compared them against a theoretical abundance of zero for this  
413 category. We compared the chi-squared statistic to the critical value obtained at the 95%  
414 significance level and obtained a corresponding P-value. For this test, larger chi-squared statistic  
415 values indicate greater differences between the observed and expected values. We applied a  
416 Bonferroni correction for multiple testing ( $n = 11$ ) per dataset, for which  $\alpha_{\text{altered}} = 0.05/11 =$   
417  $0.0045$ . A P-value  $< 0.0045$  allows rejection of the null hypothesis, and indicates the observed  
418 distribution is significantly different from the theoretical distribution.

419

## 420 **Reference Databases**

421 The choice of reference database directly affects the outcome of taxonomic profiling. For  
422 example, the use of a complete reference database versus a subset of that database can result in  
423 drastically different assignments if the same profiling method is run with otherwise identical  
424 settings. Under ideal conditions, all profiling methods would use an identical reference database.  
425 This would control for differences in information content and taxonomy, allowing observed

426 differences in assignment results to be attributed to the profiling methods. However, differences  
427 in method design and matching algorithms required the use of multiple reference databases. We  
428 therefore provide a brief description and comparison of these databases below.

429         The databases used for Kraken2, Bracken, and Centrifuge are highly similar. For  
430 Kraken2 and Bracken, we used a pre-built database that includes all RefSeq sequences for  
431 archaea, bacteria, viruses, plasmid, human, protozoa, and fungi (“PlusPF”, released 1/27/2021,  
432 available from: <https://benlangmead.github.io/aws-indexes/k2>). The Centrifuge database was  
433 built from RefSeq sequences for archaea, bacteria, viruses, and fungi (downloaded 4/2021). The  
434 Centrifuge database used can be considered a subset of the PlusPF database, but with complete  
435 overlap for several target groups (archaea, bacteria, fungi).

436         The marker-based profilers each used a specific database. MetaPhlAn3 uses a highly  
437 distinct reference database which is composed of ~1.1 million unique clade-specific markers  
438 from ~99,500 bacteria/archaea reference genomes and ~500 eukaryotic reference genomes. We  
439 used the mpa\_v30\_CHOCOPhlan\_201901 database release. mOTUs2 also uses a highly distinct  
440 database, which is composed of single copy phylogenetic marker genes for operational  
441 taxonomic units (mOTUs). We used database version 3.0.3, which contains ~12,000 reference  
442 based mOTUs, ~2,300 mOTUs obtained from metagenomic samples, and ~19,400 MAG-based  
443 mOTUs.

444         MetaMaps provides a pre-built database composed of 12,058 complete RefSeq genomes  
445 (215 archaeal, 5774 bacterial, 6059 viral/viroidal, 7 fungi, 1 human), which is referred to as  
446 MiniSeq+H. The option to create a custom database (such as NCBI nt) was initially developed  
447 for MetaMaps, but this feature is currently not functional. The MiniSeq+H database was

448 therefore the only option available for running MetaMaps in our experiment, and it represents the  
449 smallest and most incomplete database across the methods used.

450 We used the NCBI non-redundant protein database (NCBI nr) for MMseqs2 and  
451 MEGAN-LR-prot, and the NCBI nucleotide database (NCBI nt) for MEGAN-LR-nuc and  
452 BugSeq v2 (both databases downloaded April 2021). We used a more recent version of the NCBI  
453 nucleotide database for sourmash (downloaded March 2022), which was added in our revision to  
454 this manuscript. These pre-built sourmash databases consist of 47952 viral, 8750 archaeal, 1193  
455 protozoa, 10286 fungi, and 1148011 bacterial GenBank genomes and were constructed using  
456 FracMinHash 1/1000 fractional scaling (~1.3million genomes, ~40G size all together; available  
457 at <https://sourmash.readthedocs.io/en/latest/databases.html>). Sourmash provides a corresponding  
458 lineages file with taxonomic information for each database. The NCBI nt databases represent the  
459 most complete reference databases across the methods. We note that the RefSeq databases for  
460 Kraken2, Bracken, and Centrifuge are contained in NCBI nt.

461

## 462 **Profiling Method Commands**

463 To facilitate reproducible results, we provide the general commands or instructions to run each  
464 method.

465

466 ***Kraken2***. We ran Kraken version 2.1.1 for each sample. We used the pre-built PlusPF database  
467 described above, and used the following command:

```
468 kraken2 --db PlusPF --threads 24 -report SAMPLE.kreport.txt
```

```
469 SAMPLE.fasta > SAMPLE.kraken
```

470

471 **Bracken.** We ran Bracken version 2.6.0 for each sample, using the kreport outputs from  
472 Kraken2. We used the pre-built PlusPF database described above, and the following command to  
473 obtain abundances at the species level (-l S):

```
474 bracken -d PlusPF -i SAMPLE.kreport.txt -o SAMPLE.bracken -r 50  
475 -l S -t 10
```

476

477 **Centrifuge.** We ran Centrifuge version 1.0.4. We were unable to use centrifuge-download to  
478 obtain the RefSeq sequences required to build the database. We instead used kraken2-build to  
479 obtain the relevant RefSeq sequences and taxonomy files. The kraken headers were removed  
480 from the fasta sequences, and the database was built using the following command:

```
481 centrifuge-build -p 24 --conversion-table centrifuge-  
482 seqid2taxid.map --taxonomy-tree /taxonomy/nodes.dmp --name-table  
483 /taxonomy/names.dmp arc-bac-vir-fungi.fna abvf
```

484

485 Centrifuge offers the option to specify the minimum length of partial hits required for  
486 classification (--min-hitlen). We used two values for this option. We used the default value of 22,  
487 which is suitable for short read analysis, and used a value of 500 which is suitable for long reads  
488 (labeled as Centrifuge-h22 and Centrifuge-h500, respectively).

489

490 We ran Centrifuge-h22 for each sample using the following command:

```
491 centrifuge -f --min-hitlen 22 -k 20 -t -p 24 -x abvf -U  
492 SAMPLE.fasta -S SAMPLE-h22.txt --report-file SAMPLE-  
493 h22.centrifuge_report.tsv
```

494

495 We ran Centrifuge-h500 for each sample using the following command:

```
496 centrifuge -f --min-hitlen 500 -k 20 -t -p 24 -x abvf -U  
497 SAMPLE.fasta -S SAMPLE-h500.txt --report-file SAMPLE-  
498 h500.centrifuge_report.tsv
```

499

500 Outputs were converted to kreport format using the centrifuge-kreport module.

501

502 **MetaPhlan3.** Analyses were run using MetaPhlan v3.0.7. The settings used in MetaPhlan3 to  
503 run Bowtie2 will fail for long reads, so we first created alignments externally using Bowtie2:

```
504 bowtie2 -p 12 -f --local --no-head --no-sq --no-unal -S  
505 SAMPLE.sam -x /metaphlan/mpa_v30_CHOCOPhlan_201901 -U  
506 SAMPLE.fasta
```

507

508 After alignments were created, we ran MetaPhlan3 with the following settings (adjusting the  
509 number of reads per dataset, --reads):

```
510 metaphlan SAMPLE.sam --nproc 24 --input_type sam --nreads  
511 READ_NUMBER -o SAMPLE.profiled_metagenome.txt --index  
512 mpa_v30_CHOCOPhlan_201901 --bowtie2db /metaphlan
```

513

514

515 **mOTUs2.** Analyses were run using mOTUs2 v3.0.3. Each long-read dataset was converted into a  
516 short read dataset and then run through the typical profiling algorithm using the following set of  
517 commands:

```
518 motus prep_long -i SAMPLE.fastq.gz -o SAMPLE_mOTUs.fastq -no_gz
```

519

520 `gzip SAMPLE_mOTUs.fastq`

521

522 `motus profile -s SAMPLE_mOTUs.fastq.gz -o`

523 `SAMPLE_mOTUs.counts.txt -c -t 48`

524

525 ***Sourmash***. Analyses were run using sourmash version 4.5.1. A streamlined workflow for

526 sourmash is available (Taxonomic-Profiling-Sourmash) at:

527 <https://github.com/PacificBiosciences/pb-metagenomics-tools>. The pipeline is provided as a

528 configurable snakemake workflow.

529

530 Read datasets were sketched in the same manner as sourmash pre-prepared databases, using a

531 fractional scaling of 1/1000:

532 `sourmash sketch dna SAMPLE.fna.gz -p k=31,k=51,scaled=1000,abund`

533 `-name SAMPLE -o SAMPLE.sig.zip`

534

535 The database search was performed separately for each k-mer size using sourmash gather. This

536 analysis took 3-7 hours on a single thread, requiring 40-100G of memory (depending on dataset):

537 `sourmash gather SAMPLE.sig.zip genbank-2022.03-bacteria-k31.zip`

538 `genbank-2022.03-archaea-k31.zip genbank-2022.03-viral-k31.zip`

539 `genbank-2022.03-protzoa-k31.zip genbank-2022.03-fungi-k31.zip`

540 `-k 31 -o SAMPLE.gather.k31.csv`

541



542 After searching with sourmash defaults, we also ran gather at its most sensitive, allowing  
543 detection of even a single shared hash in the database (by adding `--threshold-bp 0` to the  
544 command). For each dataset and ksize, taxonomic aggregation of genome-level matches was  
545 performed using the sourmash taxonomy module, with kreport output, e.g. k31:

```
546 sourmash tax metagenome -g SAMPLE.gather.k31.csv -t genbank-  
547 2022.03-*.lineages.csv.gz -o SAMPLE.gather.k31 -F kreport
```

548

549 Note that sourmash gather outputs initial k-mer assignments to individual genomes, which is  
550 ~strain-level profiling; we did not evaluate these in our results.

551

552 **MetaMaps.** We used MetaMaps v0.1 to run analyses with the following set of commands:

```
553 metamaps mapDirectly --all -r /databases/miniSeq-H/DB.fa -q  
554 SAMPLE.fasta --maxmemory 35 -t 24 -o SAMPLE_results
```

555

```
556 metamaps classify -t 12 --mappings SAMPLE_results --DB  
557 /databases/miniSeq-H
```

558

559 The conversion from MetaMaps output format to kreport format was performed at the species  
560 level, but we note that MetaMaps can produce a large number of strain assignments that are not  
561 represented in our results.

562

563 **MMseqs2.** We used MMseqs2 v13.45111 to run all analyses. We first built the database for

564 NCBI nr using the following command:

```
565 mmseqs databases NR /mmseqs-database/NR_db /scratch --threads 24
```

566

567 We then used the easy-taxonomy module to run analyses for each sample, using the following  
568 general command:

```
569 mmseqs easy-taxonomy SAMPLE.fasta /mmseqs-database/NR_db SAMPLE  
570 /scratch --threads 48 --split-memory-limit 120G
```

571

572 **MEGAN-LR-prot.** A streamlined workflow for MEGAN-LR-prot is available (Taxonomic-  
573 Profiling-Diamond-Megan) at: <https://github.com/PacificBiosciences/pb-metagenomics-tools>.

574 The pipeline is provided as a configurable snakemake workflow. To use the workflows, we first  
575 downloaded the NCBI nr database and created a DIAMOND index using the following  
576 command:

```
577 diamond makedb --in nr.gz --db diamond_nr_db --threads 24
```

578

579 We downloaded MEGAN6 community edition to obtain the executable tools required for these  
580 workflows (sam2rma, rma2info), as well as the required MEGAN protein mapping file (megan-  
581 map-Jan2021.db). We then ran the Taxonomic-Functional-Profiling-Protein pipeline. The  
582 locations of the nr index, sam2rma, and the mapping file were specified in the main  
583 configuration file for the analysis (config.yaml), and we used all other default settings (see  
584 documentation). The information for the sample fasta files was added to the sample  
585 configuration file (Sample-Config.yaml), and the snakemake (Snakefile-taxprot) was executed.  
586 Details for the usage of each program are provided in the online documentation.

587

588 Analyses resulted in RMA output files, which were used as inputs for the MEGAN-RMA-  
589 Summary pipeline. The location of rma2info was specified in the main configuration file for the

590 analysis (config.yaml), information for the sample fasta files was added to the sample  
591 configuration file (Sample-Config-protein.yaml), and we created the required sample-read-  
592 counts file. This snakemake (Snakefile-summarizeProteinRMA) was run using all other default  
593 settings, and kreport files were included in the outputs.

594

595 **MEGAN-LR-nuc**. A streamlined workflow for MEGAN-LR-nuc is available (Taxonomic-  
596 Profiling-Minimap-Megan) at: <https://github.com/PacificBiosciences/pb-metagenomics-tools>.

597 The pipeline is provided as a configurable snakemake workflow. To use the workflow, we first  
598 downloaded the NCBI nt database and indexed it with minimap2 using the following command:

599 `minimap2 -k 19 -w 10 -I 10G -d mm_nt_db.mmi nt.gz`

600

601 We downloaded MEGAN6 community edition to obtain the executable tools required for these  
602 workflows (sam2rma, rma2info), as well as the required MEGAN nucleotide mapping file  
603 (megan-nucl-Jan201.db). We then ran the Taxonomic-Profiling-Nucleotide pipeline. The  
604 locations of the minimap2 nt index, sam2rma, and the mapping file were specified in the main  
605 configuration file for the analysis (config.yaml), and we also changed the maximum number of  
606 secondary alignments from 20 to 5. The information for the sample fasta files was added to the  
607 sample configuration file (Sample-Config.yaml), and the snakemake (Snakefile-taxnuc) was  
608 executed. Details for the usage of each program are provided in the online documentation.

609

610 Analyses resulted in RMA output files, which were used as inputs for the MEGAN-RMA-  
611 Summary pipeline. The location of rma2info was specified in the main configuration file for the  
612 analysis (config.yaml), information for the sample fasta files was added to the sample

613 configuration file (Sample-Config-nucleotide.yaml), and we created the required sample-read-  
614 counts file. This snakemake (Snakefile-summarizeNucleotideRMA) was run using all other  
615 default settings, and kreport files were included in the outputs.

616

617 The above instructions are for the MEGAN-LR-nuc-HiFi analysis. Running the MEGAN-LR-  
618 nuc-ONT analysis required some changes. Specifically, we indexed the database with minimap2  
619 using the following command:

```
620 minimap2 -k 15 -w 10 -I 10G -d mm_nt_db_ONT.mmi nt.gz
```

621

622 We then edited the minimap2 command in the snakemake file to include the ONT recommended  
623 settings:

```
624 minimap2 -ax map-ont
```

625

626 **BugSeq.** We uploaded datasets to the BugSeq online platform: <https://bugseq.com>. For each  
627 dataset, we selected the NCBI nt reference database option, and submitted the analysis. After  
628 successful completion all results were available for download.

629

630

## 631 **RESULTS**

632

633 The kreport files produced from all taxonomic classification and profiling methods, and the  
634 Jupyter notebooks used to generate the following results, are freely available on the Open  
635 Science Framework project page for this paper (<https://osf.io/bqtdu/>). These files can be used to  
636 replicate all results reported below.

637

## 638 **Comparative Analyses**

639 *Read Utilization.* Total read assignment differed drastically across methods (Fig. 2). In terms of  
640 short-read methods, Kraken, Bracken, and Centrifuge-h22 assigned the greatest number of reads  
641 (93–100% for HiFi, 81–99% for ONT). Centrifuge-h500, which required a minimum total length  
642 of 500 for partial hits, assigned far fewer reads across datasets (1–53%), with the exception of  
643 HiFi ATCC MSA-1003 (which had 98% read assignment). Read assignment was exceptionally  
644 low for Centrifuge-h500 in ONT R10 Zymo D6300 (~1%; Fig. 2). As expected, both marker-  
645 based profilers assigned the fewest reads ( MetaPhlan3: 23–39%; mOTUs2: 0.2–1%; Fig. 2).  
646 Slightly more of the dataset was assigned by sourmash-k51 versus k31 (4–15% difference; Fig.  
647 2). However, the greatest difference in sourmash assignment occurred between HiFi and ONT  
648 datasets, with far more of the dataset assigned in HiFi (81–90%) versus ONT (26–41% for ONT  
649 R10.3, 59–68% for ONT Q20).

650       There was considerable variation in read assignments across the long-read methods and  
651 across different sequencing technologies (Fig. 2). Total read assignment in the HiFi datasets  
652 ranged from 71–99% (average = 85%) across all long-read methods, and for ONT ranged from  
653 46–97% (average = 71%). For the ONT datasets, MetaMaps and BugSeq-V2 assigned the  
654 greatest number of reads (95–97%), with all other methods assigning fewer reads (46–67%).  
655 Methods that rely on translation alignments to protein references assigned more reads in the HiFi  
656 datasets versus ONT datasets, including MMseqs2 (HiFi: 94–99%; ONT: 46–67%) and  
657 MEGAN-LR-prot (HiFi: 71–74%; ONT: 60–62%) (Fig. 2). There were no clear differences in  
658 total read assignment for MEGAN-LR-nuc-HiFi and MEGAN-LR-nuc-ONT within the ONT  
659 datasets or the HiFi datasets, suggesting read assignment was not sensitive to different minimap2

660 settings. The MEGAN-LR-nuc methods resulted in a higher number of reads assigned in HiFi  
661 datasets (81–90%) versus ONT datasets (54–60%). BugSeq-V2 assigned more reads in the ONT  
662 datasets (95–96%) versus HiFi datasets (82–93%). As expected, methods using LCA algorithms  
663 during assignment (MMseq2, all three MEGAN-LR workflows, BugSeq-V2) displayed a  
664 significant proportion of annotations to taxonomic ranks above the strain and species level (Fig.  
665 2). However, the MEGAN-LR-nuc methods showed a smaller proportion of reads assigned to  
666 higher ranks, relative to the protein-alignment methods.

667

668 *Detection Metrics.* The complete set of read counts per dataset used in the species and genus-  
669 level analyses are provided in Supplementary Tables S1–S8. Detection at different thresholds  
670 follows the minimum read counts in Table 3. Species and genus level results are provided for  
671 each dataset in Figures 3 and 5 and Table 4. Averaged results per method across all datasets are  
672 shown in Figures 4 and 6, and technology specific results are shown in Supplementary Figures  
673 S2 and S3.

674 The species-level detection results based on the minimum threshold of 0.001% of the  
675 total reads are summarized in Figures 3 and 4 and Table 4. The clearest difference in  
676 performance occurs between short-read and long-read/generalized methods (including  
677 sourmash). The short-read methods display very low precision and relatively high recall, and  
678 consequently very low F-scores (Figs. 3, 4). These results for precision and F-scores are driven  
679 by the large number of false positives detected (40–300) despite the presence of few false  
680 negatives (Table 4). We note that Bracken did not significantly improve the results of Kraken2,  
681 based on these measures (Figs. 3, 4). The Centrifuge-h500 analysis, which required longer  
682 matches, resulted in a lower number of false positives and consequently higher precision (Fig. 3,

683 Table 4), though this improvement varied considerably across datasets (Fig. 4). MetaPhlan3  
684 displayed values that were intermediate between Centrifuge-h500 and the other short-read  
685 methods. An exception to this rule occurs with mOTUs2, which displays high precision and  
686 moderate recall (Figs. 3, 4). By precision and F-scores, mOTUs2 outperforms all other short read  
687 methods by a considerable margin.

688 The long-read methods and sourmash outperformed the short-read methods in terms of  
689 precision, recall, and F-scores (Fig. 3, Table 4), but they also displayed variation in performance.  
690 Some methods did not show consistent results and performed better for a particular dataset. For  
691 example, MetaMaps and MMseqs2 performed quite well for HiFi ATCC MSA-1003. However,  
692 these two methods performed worse for the other three datasets and more closely resembled the  
693 results for the short-read methods (e.g., very low precision, higher recall; Fig. 3, Table 4).  
694 Interestingly, sourmash displayed high precision and recall for HiFi datasets (highest in k51),  
695 outperforming most long-read methods (Fig. 3, Supplementary Fig. S2). However, its  
696 performance decreased for the ONT datasets; this is particularly noticeable for ONT R10 (Fig. 3,  
697 Supplementary Fig. S3). Across all four datasets, MEGAN-LR-prot, MEGAN-LR-nuc-HiFi,  
698 MEGAN-LR-nuc-ONT, and BugSeq-V2 consistently displayed the best performance (Figs. 3, 4).  
699 These four methods detected most species in the communities (e.g., low false negatives) and  
700 rarely called any false positives (0–2). Consequently, they display high precision, moderate to  
701 high recall, and the highest F-scores (Fig. 3). The moderate recall scores for the HiFi datasets  
702 resulted from the failure to detect species at lower abundances, particularly for the 0.02% to  
703 0.0001% abundance levels (Supplementary Table S9). Sourmash (k31 and k51) displayed  
704 exceptional recall for these challenging HiFi datasets, detecting all species at 0.02% and 0.001%  
705 relative abundance (Supplementary Table S9). For the ONT datasets, the species in Zymo D6300

706 had comparatively high abundances (12% and 2%), and this was reflected in perfect recall for  
707 nearly all long-read methods as well as sourmash (Fig. 3, Table 4). We did not observe any  
708 difference in performance between MEGAN-LR-nuc-HiFi and MEGAN-LR-nuc-ONT for the  
709 ONT datasets or HiFi datasets, suggesting the profiling analyses are not sensitive to minimap2  
710 alignment settings.

711         The genus-level analysis based on the minimum threshold of 0.001% of the total reads  
712 largely mirrored the species-level results, but with expected improvements in precision, recall,  
713 and F-scores (Figs. 5, 6, Supplementary Table S10). Improvements were nearly guaranteed  
714 because reads assigned to multiple species within a genus are all considered correct at the genus  
715 level, and consequently the number of false positives (and potentially false negatives) decreased.  
716 Despite improvements in precision, recall, and F-scores across all methods at the genus level, the  
717 long-read methods still outperformed most short-read methods by a considerable margin (Fig. 4,  
718 Supplementary Table S10). We observed perfect precision in mOTUs2, but it displayed lower  
719 recall relative to long-read methods (Fig. 6). Sourmash (k31 and k51) displayed perfect recall  
720 and precision was comparable to the long-read methods (particularly for HiFi datasets, Figs. 5, 6,  
721 Supplementary Figure S2).

722         Requiring a moderate minimum threshold for detection (0.1% of total reads) for the  
723 species-level analysis had an overall positive effect on precision, but negative effect on recall  
724 (Supplementary Fig. S4, Supplementary Table S11). These changes were most dramatic for the  
725 short-read methods, in which the number of false positives was reduced from several hundred to  
726 ~10 or fewer, thereby increasing precision considerably (Supplementary Table S11). However,  
727 despite this improvement the long-read methods still performed better in terms of precision and  
728 F-scores (Supplementary Fig. S4). Precision increased for some long-read methods (MetaMaps,



729 MMseqs2), but others were unaffected as they were already high at the lower detection  
730 threshold. As expected, this increase in minimum detection threshold most strongly impacted  
731 recall in the communities with staggered abundances (HiFi datasets) versus communities with  
732 even abundances (ONT datasets). In the HiFi datasets, the long-read methods displayed more  
733 false negatives which resulted in lower recall (Supplementary Fig. S8). At the 0.1% total reads  
734 detection threshold, all methods (long and short) failed to detect species with <0.02% abundance  
735 and missed several species with 0.1–1.8% abundance (Supplementary Table S12). Surprisingly,  
736 this detection threshold also reduced the recall of some methods for the ONT datasets, with a  
737 more noticeable reduction in recall values for ONT R10 Zymo D6300 (Supplementary Fig. S4,  
738 Supplementary Table S11). The patterns for the genus-level analysis using the 0.1% total reads  
739 detection threshold mirrored the species-level results (Supplementary Fig. S5). Precision  
740 increased in the short-read methods across all datasets, and recall was lowered in the staggered  
741 abundance communities (Supplementary Table S13).

742         The highest minimum threshold for detection used in our experiment (1% of total reads)  
743 exacerbated the effects described for the 0.1% detection threshold. The most noticeable effects  
744 were for the communities with staggered abundances: all methods displayed perfect precision  
745 (with one exception), but recall was drastically lowered (<0.6; Supplementary Fig. S6,  
746 Supplementary Table S14). In other words, false positives were completely eliminated, but at the  
747 cost of vastly increased false negatives. Using 1% of total reads as the minimum detection  
748 threshold for HiFi ATCC MSA-1003 and Zymo D6331, all methods (long and short) failed to  
749 detect species with <1.8% relative abundance, and some species were not detected in the 1.5%  
750 and 6% abundance levels (Supplementary Table S15). This higher threshold for detection also  
751 impacted results for the even abundance communities (ONT R10 and Q20 for Zymo D6300).

752 Precision increased primarily for the short-read methods, yet perfect precision was not achieved  
753 by all methods (Supplementary Fig. S6, Supplementary Table S14). This higher detection  
754 threshold also caused recall to drop ( $<0.8$ ) in these datasets for all methods except Kraken2,  
755 Bracken, and one instance of BugSeq V2, each of which maintained perfect recall  
756 (Supplementary Fig. S6). This indicates that multiple methods failed to detect several species at  
757 the 2% and 12% abundance levels in Zymo D6300. These effects were mirrored in the genus-  
758 level analysis with the 0.1% detection threshold (Supplementary Fig. S7, Supplementary Table  
759 S16).

760

761 *Relative Abundance Estimates.* The species-level and genus-level relative abundances are shown  
762 in Figures 7 and 8, respectively. The results of the chi-squared goodness of fit tests (GOF) are  
763 reported in Supplementary Tables S17 and S18 and highlighted in Figures 7 and 8. The L1  
764 scores are reported in Table 4 and Supplementary Tables S10, S19, S23, and S27. At the species  
765 level, abundance estimates by the long-read methods and sourmash were more accurate than  
766 those produced by short-read methods across all datasets (based on L1 distances and chi-squared  
767 test statistic values). For HiFi ATCC MSA-1003, MetaMaps, MMseqs2, MEGAN-LR-prot, and  
768 BugSeq-V2 all passed the GOF, and BugSeq-V2 had the lowest error. All methods failed the  
769 GOF for HiFi Zymo D6331 at the species level (which had two species missing from most  
770 databases, see methods), but MEGAN-LR-prot and BugSeq-V2 resulted in the lowest error. For  
771 ONT R10 Zymo D6300, mOTUs2, sourmash-k51, and BugSeq-V2 passed the GOF. Both  
772 BugSeq-V2 and MEGAN-LR-prot passed the GOF for ONT Q20 Zymo D6300. At the genus  
773 level we generally found more methods passed GOF for each dataset, except for HiFi Zymo  
774 D6331 for which only sourmash (k31 and k51) and BugSeq-V2 passed (Supplementary Table

775 S18). All methods that accurately estimated abundances at the species level also passed the GOF  
776 at the genus level (Figs. 7, 8). We additionally found Centrifuge (h22 and/or h500) and  
777 MetaMaps passed GOF at the genus level in some datasets in which they failed at the species  
778 level (Figs. 7, 8). Across all datasets and levels, we generally found that BugSeq-V2 had the  
779 lowest abundance error, followed closely by MEGAN-LR-prot (Supplementary Tables S17,  
780 S18). Across datasets, the proportion of reads assigned to false positives ('Other', Figs. 7, 8) was  
781 generally highest for MetaPhlan3, followed by Kraken2 and Bracken.

782

783 *Analyses of Shorter ONT Reads.* Comparisons of the length-filtered variations of each ONT  
784 dataset revealed that shorter reads (< 2kb) negatively impacted taxonomic profiling analyses. For  
785 each ONT dataset, we created a primary dataset which contained only longer reads (> 2kb) and a  
786 secondary dataset which had a large proportion of shorter reads (< 2kb; see methods). In the  
787 primary datasets, precision and F-scores were very high for long-read methods and low for short-  
788 read methods at the 0.001% reads detection threshold. In the secondary datasets, precision and F-  
789 scores were comparatively lower for the long-read methods and were similarly low for the short-  
790 read methods (Supplementary Fig. S8, Tables S19, S20). Based on Wilcoxon Signed-Rank tests,  
791 the observed differences in precision and F-scores between the primary and secondary datasets  
792 were not statistically significant. However, at the 0.1% reads detection threshold we found  
793 precision and F-scores were substantially lower in the secondary datasets at both the species and  
794 genus level, across all methods (Supplementary Fig. S8, Tables S19, S20). These differences in  
795 precision and F-scores were statistically significant ( $p < 0.01$  for all comparisons). In contrast to  
796 most methods, BugSeq produced relatively consistent results in precision and F-scores between  
797 the primary and secondary datasets across the different filtering thresholds.

798 Relative abundance estimates appeared heavily skewed in the secondary datasets, and  
799 most methods greatly overestimated the abundance of *Limosilactobacillus fermentum* in the  
800 community (Supplementary Fig. S9). Interestingly, in the secondary datasets the abundance error  
801 at the species level decreased for the short-read methods but increased in the long-read methods.  
802 At the genus level, abundance error appeared to increase across all methods in the secondary  
803 datasets. Based on Wilcoxon Signed-Rank tests, we did not find a significant difference in  
804 abundance error between the primary and secondary datasets at the species level, but at the genus  
805 level abundance error was significantly higher in the secondary datasets ( $p < 0.05$  for the R10  
806 and Q20 comparison). In the secondary datasets, nearly every method failed the chi-squared  
807 goodness of fit test at the species level (21 of 22) and genus level (20 of 22; Supplementary  
808 Tables S21, S22). We found BugSeq and Centrifuge-h22 passed the GOF for the species level of  
809 ONT R10 Short, and BugSeq passed the GOF for ONT R10 Short at the genus level  
810 (Supplementary Tables S21, S22). No methods passed the GOF for ONT Q20 Short at the  
811 species or genus level.

812  
813 *Analyses of Illumina and Artificial Short Reads.* We evaluated the performance of Kraken2,  
814 Bracken, Centrifuge-h22, MetaPhlan3, mOTUs2, and sourmash (k31 and k51) for two types of  
815 short-read datasets for the ATCC MSA-1003 and Zymo D6300 mock communities. We found  
816 detection and abundance results were highly similar between the Illumina short-read datasets and  
817 the “simulated” short-read datasets (SR-Sim; which were derived from the long reads). This  
818 indicates that for short-read methods, the differences in results between the long-read datasets  
819 and the Illumina short-read datasets are unlikely to be driven by platform-specific or  
820 confounding effects (such as DNA extraction methods or error profiles). However, the fraction

821 of dataset assigned using sourmash was quite different between the Illumina (94–96%) and the  
822 SR-Sim ONT dataset (62.9–72.6%) for Zymo D6300. The SR-Sim ONT was created from the  
823 ONT Q20 long reads, and we note sourmash also assigned a comparable fraction of reads in the  
824 full length ONT Q20 dataset (59–68%). These results suggest that error profile impacts sourmash  
825 profiling performance.

826         The precision, recall, and F-score values obtained from the short-read datasets strongly  
827 resembled those obtained from long reads for both communities (Figs. 9, 10, Table 4,  
828 Supplementary Figure S10, Supplementary Tables S23–24, S27–28). This overall pattern  
829 included low precision and high recall for Kraken2, Bracken, and Centrifuge-h22. MetaPhlan3  
830 improved in performance, with high precision and moderate recall, comparable to mOTUs2.  
831 Sourmash was the top performer in the short-reads datasets with perfect recall and high precision  
832 (Figs. 9, 10). More stringent filtering (0.1% or 1% of total reads) dramatically reduced false  
833 positives for Kraken2, Bracken, and Centrifuge-h22, but also negatively impacted recall  
834 (Supplementary Table S23), and in many cases produced scores that were worse than the long-  
835 read scores for these method and filtering combinations (Supplementary Table S11, S14). The  
836 same patterns were present for the genus-level analyses of the short-read datasets of ATCC  
837 MSA-1003 (Supplementary Table S24) and the less complex ZymoD6300 community (10  
838 species).

839         The short-read datasets failed to produce accurate relative abundance estimates (Fig. 9,  
840 Supplementary Figures S11–12, Supplementary Tables S25–26, S29–30). All short-read methods  
841 failed the chi-squared goodness of fit test at the species level in both communities, and at the  
842 genus level only sourmash-k51 passed the goodness of fit test across multiple datasets  
843 (Supplementary Figure S12).

844

845 **DISCUSSION**

846

847 With decreasing error rates in long reads and the recent introduction of new long-read read  
848 profiling methods, long reads are increasingly utilized for metagenomic applications. We used  
849 publicly available mock community datasets to perform a critical assessment of taxonomic  
850 profiling methods for long-read datasets, including five long-read methods, five short-read  
851 methods, and one generalized method. While all methods displayed some trade-offs between  
852 precision and recall, our results suggest that generalized methods (e.g., sourmash) and methods  
853 designed for long reads performed best.

854 In our study, we included a mix of short-read classifiers (Kraken2, Centrifuge), short-  
855 read profilers (Bracken, MetaPhlan3, mOTUs2), a generalized profiler (sourmash), and several  
856 long-read classifiers (MetaMaps, MMSeqs2, BugSeq, MEGAN-LR-prot, MEGAN-LR-nuc-HiFi,  
857 and MEGAN-LR-nuc-ONT). The ideal taxonomic classifier or profiler should display high  
858 precision and recall. We found that the methods examined here tended to fall into three broad  
859 categories: 1) high precision and moderate recall, 2) moderate precision and high recall, and 3)  
860 low precision and high recall (Fig. 3A). The first two categories provide the best tradeoffs, with  
861 the third category displaying undesirable properties. Overall, we find that BugSeq, MEGAN-LR-  
862 prot, and MEGAN-LR-nuc provide the best tradeoffs for all long-read metagenomics data. In  
863 addition to these three, sourmash was also a top-performing method for HiFi datasets. Below, we  
864 discuss our findings for short-read, long-read, and generalized methods, including tradeoffs, best  
865 practices, and the impact of shorter reads. Finally, we briefly summarize the effects of read  
866 accuracy on method performance.

867  
868 *Short-read methods.* A majority of short-read methods (Kraken2, Bracken, Centrifuge-h22)  
869 assigned a high proportion of reads and displayed high recall, but they produced poor abundance  
870 estimates. They also recovered a very high number of false positives (15–300 species) and  
871 consequently had very low precision and F-scores (Figs. 2–4). False positives were not a trivial  
872 proportion of assigned reads; they comprised up to 25% of the reads assigned at the species level  
873 (Fig. 7). We attempted to apply long-read settings to Centrifuge (Centrifuge-h500) to improve  
874 detection results. Unfortunately, this setting reduced total read assignment and had unpredictable  
875 outcomes on precision, recall, and F-scores across the datasets (Figs. 2–4). The marker-based  
876 profilers had variable performance. MetaPhlAn3 displayed low precision and moderate recall,  
877 whereas mOTUs2 displayed high precision with comparable recall (Fig. 4). Both methods  
878 assigned a low percentage of reads, which is typical for marker-based mapping methods.  
879 Previous studies have shown similar results for these methods with short-read datasets [3, 8, 9],  
880 but here we demonstrate the use of long reads does not significantly change these trade-offs.

881 We attempted to improve the results from short-read methods using various levels of  
882 filtering. Specifically, we applied different minimum thresholds for detection (0.001%, 0.1%,  
883 and 1% of the total reads) in an effort to reduce false positives and improve precision. A  
884 moderate detection threshold (0.1% total reads) successfully reduced the false positive count of  
885 species from hundreds to fewer than 15, and without significantly reducing recall. However,  
886 precision in these methods was still below scores produced by the long-read methods without  
887 any filtering. A stringent detection threshold (1% total reads) greatly improved precision for  
888 many short-read methods, but severely impacted recall by eliminating detection of many species  
889 at lower abundance levels (<2% abundance). Overall, we found that filtering was necessary to

890 reduce false positives and improve precision in the short-read methods. However, none of the  
891 filtering strategies successfully balanced precision and recall to produce results similar to the  
892 long-read methods.

893 We analyzed short read Illumina datasets for two of the mock communities to evaluate if  
894 any short-read methods performed differently. We found consistent results across short and long-  
895 read datasets for Kraken2, Bracken, and Centrifuge (high false positives, low precision). For  
896 these methods, the outcomes appear to be driven by characteristics of the methods themselves,  
897 rather than read type. However, we observed an improvement in MetaPhlan3 (higher precision),  
898 indicating this method is potentially sensitive to the read type. We could not appropriately  
899 evaluate differences mOTUs2 because the “long read” analyses consisted of short reads derived  
900 from the long reads, meaning the inputs for both the short and long-read analyses were highly  
901 similar.

902  
903 *Long-read and generalized methods.* Several long-read profiling methods showed consistent and  
904 favorable characteristics across all datasets. These include MEGAN-LR-prot, MEGAN-LR-nuc  
905 (both mapping settings), and BugSeq, which displayed medium to high read assignment and very  
906 high precision (Figs. 2, 5, Table 4). Recall values from these methods differed between the  
907 staggered abundance and even abundance communities (0.7–0.8 and 1, respectively). This  
908 difference is explained by the failure to detect species with <0.02% abundance in the staggered  
909 community. In contrast to the short-read methods, several long-read methods estimated accurate  
910 species abundances for the complex communities (particularly ATCC MSA-1003; Fig. 7).  
911 Across all communities, we generally found BugSeq displayed the lowest abundance error of any  
912 method, followed by MEGAN-LR-prot. Though abundance error was higher for Metamaps,



913 MMseqs2, and MEGAN-LR-nuc, these methods still performed better than most short-read  
914 methods in most cases. We found that MetaMaps and MMseqs2 showed high read assignment  
915 and precision for one dataset (HiFi ATCC MSA-1003), but for all other datasets showed  
916 unfavorable qualities which resembled many short-read methods (e.g., high false positives and  
917 low precision, high recall). This contrasts with a recent study by Marić et al. (2020), who found  
918 MetaMaps performed better than MEGAN-LR. However, Marić et al. (2020) produced  
919 alignments for MEGAN-LR using a different method (LAST) and a reduced database, which  
920 may explain these differences. Several long-read methods displayed high or perfect precision  
921 (MEGAN-LR-prot, MEGAN-LR-nuc, BugSeq), and this did not change after applying a  
922 moderate detection threshold (0.1% of total reads). However, we observed a dramatic  
923 improvement in precision for MMseqs2 and MetaMaps (Supplementary Fig. S6). This was  
924 accompanied by a slight reduction in recall, suggesting this filtering strategy is beneficial for  
925 these methods. A more stringent detection threshold (1% total reads) resulted in perfect precision  
926 but severely reduced recall for all long-read methods, and is not advised. Overall, we found that  
927 filtering was not required for many long-read methods (MEGAN-LR-prot, MEGAN-LR-nuc,  
928 BugSeq), and that moderate filtering could be used to balance precision and recall for methods  
929 with higher false positive rates (MetaMaps, MMseqs2).

930         The generalized method, sourmash, also performed consistently well on most datasets,  
931 with nearly perfect recall and precision similar to the top performing long-read classifiers.  
932 Sourmash k31 only had one false negative in any dataset: *Clostridium perfringens*, which had a  
933 theoretical abundance of 0.0001% in Zymo D6331. When sourmash gather was run with default  
934 fractional scaling (1/1000 k-mers) but without a detection threshold (any k-mer match is  
935 reported), matches were found to 651 *Clostridium perfringens* genomes, with the most k-mer

936 matches to GCA\_902166105.1 (*Clostridium perfringens* strain=4928STDY7387913; 220 k-  
937 mers, representing approximately 22,000 bp sequence). This finding suggests that the fractional  
938 scaling was sufficient for detection, but the match was eliminated during the greedy minimum-  
939 set-cover assignment to best-match genomes. Disambiguating extremely low-abundance  
940 genomes from similar genomes truly present in the community represents a challenge for  
941 sourmash's greedy assignment algorithm: most k-mer matches to genomes in the genus  
942 *Clostridium* were shared with the *Clostridioides difficile* genome match (1.5% of Zymo D6331),  
943 leaving < 10kb of detected sequence that uniquely matched *Clostridium perfringens* genomes,  
944 far below the default threshold for sourmash gather (50kb). While zero-threshold gather is too  
945 sensitive (yielding many false positives), setting a moderately lowered detection threshold may  
946 improve recall of very low-abundance genomes in long-read datasets, particularly as sequencing  
947 depth tends to be lower than typical short-read datasets, which sourmash has primarily been  
948 tested on.

949         Sourmash displayed high precision, comparable to long-read classification methods. The  
950 majority of species-level false positives results represented different species in the same genus.  
951 As k-mer matching is less tolerant of sequence mismatch than alignment methods, these FP  
952 matches may represent genomic sequence shared across these species, but with sequence  
953 mismatches in the sequenced metagenome compared with the reference species in GenBank.

954         In terms of dataset utilization, sourmash performed less well for ONT data compared  
955 with datasets from other platforms, regardless of read length. This, with the observed improved  
956 performance on ONT Q20 compared with R10.3, suggests that the error profile may reduce exact  
957 matching of k31 and k51 k-mers to reference genomes. However, sourmash still performed well  
958 on ONT community composition and relative abundance, suggesting that ONT datasets provide

959 sufficient non-erroneous k-mers for assignment via the minimum-set-cover approach, and that  
960 the error profile does not result in profiling bias across taxa.  
961  
962 *Best Practices and Detection limits.* Our findings demonstrate the important trade-offs between  
963 precision, recall, and detection limits. Taxonomic profiling methods which have high recall (e.g.,  
964 they find all the species present in a community) also tend to have low precision (e.g., they  
965 recover many false positives). In our experiment, methods with these characteristics include  
966 many short-read methods (Kraken2, Bracken, Centrifuge-h22, MetaPhlan3), and several long-  
967 read methods (MetaMaps, MMseqs2). There is one clear exception to this rule – sourmash  
968 displays near perfect recall and high precision, particularly in the HiFi datasets (Fig. 3,  
969 Supplementary Fig. S2). Sourmash is k-mer-based, similar to Kraken2, Bracken, and Centrifuge,  
970 but uses k-mers from across the entire dataset, rather than individual reads, to find best-match  
971 genomes. In this way, it is able to leverage longer-range information present in a dataset, though  
972 not across reads themselves. By contrast, most other methods which have high precision (e.g., no  
973 false positives) tend to have lower recall (e.g., not all species are detected). In our experiment,  
974 this was represented by several long-read methods, including MEGAN-LR-prot, MEGAN-LR-  
975 nuc, and BugSeq. These three methods involve mapping reads to whole-reference databases, and  
976 subsequently interpreting alignments across the entire length of reads. This strongly suggests that  
977 top-performing methods are those that can utilize long-range information available in long reads.  
978 Although mOTUs2 displays high precision, its current implementation breaks long reads into  
979 artificial short reads and eliminates all long-range information, making it less desirable for long-  
980 read metagenomics.

981           If precision is the most important aspect of a long-read metagenomics experiment, we  
982 suggest using MEGAN-LR-prot, MEGAN-LR-nuc, or BugSeq, which do not require any  
983 additional post-processing or filtering. The choice among them could depend on which  
984 references will be used (proteins: MEGAN-LR-prot; nucleotide sequences: BugSeq, MEGAN-  
985 LR-nuc), computational skills/resource availability (BugSeq is an online service platform; the  
986 MEGAN-LR workflows require high resources and bioinformatics experience), and abundance  
987 estimation (BugSeq and MEGAN-LR-prot are considerably more accurate than MEGAN-LR-  
988 nuc). One additional advantage of MEGAN-LR-prot is that it simultaneously assigns functional  
989 annotations to genes on reads, providing both taxonomic and functional profiles.

990           There may also be cases where recall is more important for an experiment. For these use-  
991 cases we recommend using sourmash, which had the highest recall without reduced precision.  
992 With sourmash, we detected all species down to 0.001% relative abundance in the HiFi datasets,  
993 with only 2–3 false positives (Table 4, Supplementary Table S9). While this method appears to  
994 have reduced precision with ONT data (Supplementary Fig. S3), the genome-level assignments  
995 produced during rapid sourmash profiling could be used as candidate genomes for detailed,  
996 alignment-based analysis to confirm results and reduce false positives [35]. Other long-read  
997 methods with high precision (MEGAN-LR-prot, MEGAN-LR-nuc, BugSeq) had excellent recall  
998 for species with higher abundances. These three methods confidently detected species with 0.1%  
999 and greater abundance in all the mock communities, with no false positives detected at these  
1000 higher abundance levels. However, the lower detection limit for these three methods appears to  
1001 be somewhere between 0.1% and 0.02% relative abundance. An important caveat is that these  
1002 detection limits are based on results from the PacBio HiFi staggered communities, which consist  
1003 of 2–2.5 million reads and a minimum detection count of 20–25 reads (Table 3).

1004           Finally, it is important to consider the impact of novel sequences on performance. All  
1005 species in our study have suitable representation in the databases used (but see caveats for Zymo  
1006 D6331), and we therefore did not investigate this topic explicitly. However, we propose three  
1007 features may be important for working with novel diversity in empirical samples. First, the LCA  
1008 algorithm provides beneficial behavior in ambiguous cases, preventing mis-assignments at the  
1009 species level by making assignments to higher taxa. Second, protein-based alignments may be  
1010 more advantageous than nucleotide alignments or k-mer matches for highly distant sequences.  
1011 Finally, methods which utilize large, comprehensive databases should provide advantages over  
1012 smaller or marker-specific databases. For example, utilizing NCBI nt or nr allows for the  
1013 inclusion of new sequences that are continuously deposited in public databases. We propose the  
1014 effects of novel sequences would be a useful topic for future study, particularly for long-read  
1015 datasets.

1016

1017 *Effects of Shorter Reads.* Our comparisons of length-filtered datasets strongly suggest that  
1018 including shorter long reads (< 2kb) can have an adverse effect on taxonomic profiling. We  
1019 found that datasets with many shorter reads had significantly lower precision and F-scores  
1020 compared to datasets containing only longer reads. We also found that the inclusion of shorter  
1021 reads heavily skewed relative abundance estimates, which are based on read counts in our  
1022 experiment. We acknowledge that calculating abundance estimates from the total number of  
1023 aligned bases could potentially mitigate this effect. More importantly, we found that precision, F-  
1024 scores, and relative abundances were affected across all methods, suggesting these shorter read  
1025 lengths may be a “gray” zone for both classes of methods. For example, some long-read methods  
1026 require the presence of multiple genes for the LCA algorithm to function well (MMSeqs2,

1027 MEGAN-LR-prot). Reads that are <2kb are unlikely to satisfy this criterion. Therefore, we  
1028 strongly recommend filtering these shorter long reads before attempting taxonomic  
1029 classification. This can be achieved bioinformatically after sequencing, but performing size  
1030 selection during library preparation can also greatly reduce the number of shorter fragments that  
1031 are sequenced.

1032

1033 *Effects of Read Accuracy.* We included mock community datasets sequenced with PacBio HiFi  
1034 and ONT, allowing for limited comparisons of methods across sequencing technologies. One  
1035 noticeable difference occurs in read utilization for methods that perform translation alignments to  
1036 protein references and exact k-mer matching. For example, more reads were assigned in HiFi  
1037 versus ONT datasets for MMseqs2 (94–99% vs. 46–67%) and to a lesser extent MEGAN-LR-  
1038 prot (71–74% vs. 60–62%). This result could be related to differences in the mock communities  
1039 sequenced, however the species in all three mock communities are expected to have adequate  
1040 representation in the databases (except two species in HiFi Zymo D6331). It is more likely that  
1041 differences in error profiles explain these results, as even slightly higher error rates are expected  
1042 to negatively impact translation alignment (broken reading frames, premature stop codons). This  
1043 idea is supported by two observations. First, this effect was more pronounced for MMseqs2,  
1044 which uses Prodigal for translation rather than a frameshift-aware method such as DIAMOND.  
1045 Second, the ONT data include an R10.3 dataset with Guppy basecalling (mean = Q10.5; reported  
1046 at data source) and the newest “Q20” chemistry release with Bonito v0.3.5 basecalling (expected  
1047 modal quality ~Q20), and we found fewer reads were assigned in the R10.3 dataset versus the  
1048 Q20 dataset for MMSeqs2 (46% vs. 67%, respectively). We note the same pattern was present  
1049 for Centrifuge-500, which requires 500 matched k-mer bases to the reference; read assignment

1050 improved dramatically from ONT R10.3 to Q20 (1% vs. 53%, respectively). This result also  
1051 occurred for sourmash, another k-mer-based method. Here, read assignment improved from ONT  
1052 R10.3 to Q20 (41% vs. 68% for sourmash-k31; 26% vs. 59% for sourmash-k51). However,  
1053 despite the improvement in accuracy for the ONT Q20 dataset, it still had lower read assignment  
1054 for protein alignment methods and sourmash as compared to both HiFi datasets (Fig. 2). The  
1055 HiFi ATCC and Zymo datasets are more accurate; all reads are >Q20 and the median scores are  
1056 Q36 and Q40. Together, these results suggest that read quality remains critical for high-quality  
1057 taxonomic profiling with long-read methods.

1058         Different mock communities were available for PacBio HiFi (ATCC MSA-1003, Zymo  
1059 D6331) and ONT (Zymo D6300), which prevents a direct comparison of detection metrics  
1060 (precision, recall, and F-scores) and detection limits across sequencing technologies. The mock  
1061 community sequenced with ONT is simpler than the HiFi mock communities in terms of the total  
1062 number of species (10 vs. 17/20) and relative abundances (even vs. staggered). The simpler  
1063 mock community design also prevented us from estimating recall and detection limits for lower  
1064 abundance species with ONT data; our conclusions about detection power at low abundances are  
1065 based exclusively on PacBio HiFi data. In their study, Marić et al. [17] found that ONT pseudo-  
1066 mock datasets displayed lower classification accuracy, higher false positives, and higher relative  
1067 abundance error relative to PacBio pseudo-mock datasets. However, the pseudo-mock datasets  
1068 for ONT and PacBio included in their study contained different numbers of species and  
1069 abundance designs, meaning they were not direct comparisons. We caution against this type of  
1070 approach, and instead propose that an objective comparison of detection metrics should be  
1071 performed by sequencing the same mock community standard using both technologies. We also

1072 propose that a mock standard with high species diversity and staggered abundances will provide  
1073 the most meaningful information for future benchmarking studies.

1074

## 1075 **CONCLUSION**

1076

1077 With increasing quality and prevalence of long-read datasets, it is critical to assess the utility of  
1078 these data for taxonomic profiling of metagenomic samples. Here, we evaluated several profiling  
1079 and classification methods for mock communities sequenced with PacBio HiFi and ONT. We  
1080 also included Illumina short read data for these communities as a comparison. Our results  
1081 demonstrate there are clear precision and recall trade-offs associated with each method. We  
1082 found that several popular short-read methods (Kraken2, Bracken, Centrifuge) resulted in many  
1083 false positives, particularly at lower abundance levels. Filtering can increase precision for these  
1084 methods, but comes at the cost of severely reducing recall. Importantly, we determined this  
1085 pattern of low precision and high recall occurred for these methods using both long-read and  
1086 short-read datasets. This suggests the methods themselves, rather than differences in read lengths  
1087 or platform, are driving these outcomes. By contrast, we found sourmash and several long-read  
1088 classifiers displayed high precision and recall without any filtering necessary. These long-read  
1089 classifiers are alignment-based, and include BugSeq (nucleotide alignments), and MEGAN-LR  
1090 using translation alignments (DIAMOND to NCBI nr) or nucleotide alignments (minimap2 to  
1091 NCBI nt). Sourmash has the highest detection power, finding all species down to 0.001% relative  
1092 abundance with minimal false positives. Our comparisons between long-read sequencing  
1093 technologies indicate that read quality remains critical for taxonomic profiling performance. We  
1094 found that read accuracy impacts the success of methods relying on protein predictions or exact



1095 k-mer matches. We also found a high proportion of shorter long reads (<2kb) can result in lower  
1096 precision and inaccurate abundance estimates, relative to length-filtered datasets. However, we  
1097 emphasize that for any given mock community, the long-read dataset (analyzed with sourmash or  
1098 any long-read method) produced significantly better results than the short-read datasets. Methods  
1099 which utilize long-range information present in long-read datasets provide clear improvements in  
1100 taxonomic profiling and abundance estimation, and demonstrate a clear advantage over short-  
1101 read methods. To continue studying these effects, we propose that cross-platform sequencing of  
1102 more complex standardized mock communities would be useful for future benchmarking studies.  
1103  
1104

1105 **DECLARATIONS**

1106

1107 **Ethics approval and consent to participate**

1108 Not applicable.

1109

1110 **Consent for Publication**

1111 Not applicable.

1112

1113 **Availability of Data and Materials**

1114 The mock community datasets are publicly available from the National Center for Biotechnology

1115 Information (NCBI), European Nucleotide Archive (ENA), or public lab websites: HiFi ATCC

1116 MSA-1003 (NCBI: PRJNA546278: SRX6095783), HiFi Zymo D6331 (NCBI: PRJNA680590:

1117 SRX9569057), Illumina ATCC MSA-1003 (NCBI: PRJNA510527: SRX5169925), Illumina

1118 Zymo D6300 (NCBI: PRJNA648136: SRX8824472), ONT Q20 Zymo D6300 (ENA:

1119 PRJEB43406: ERR5396170), and ONT R10 Zymo D6300

1120 (<https://lomanlab.github.io/mockcommunity/r10.html>). The kreport output files for all methods

1121 and datasets, along with Jupyter notebooks and results files, are freely available on the Open

1122 Science Framework: <https://osf.io/bqtdu/>.

1123

1124 **Competing Interests**

1125 DMP is an employee and shareholder of Pacific Biosciences of California, Inc.

1126

1127 **Funding**

1128 Not applicable.

1129

1130 **Authors' Contributions**

1131 Daniel M. Portik, N. Tessa Pierce-Ward and C. Titus Brown conceptualized the experiment,

1132 Daniel M. Portik and N. Tessa Pierce-Ward performed data analysis, Daniel M. Portik and N.

1133 Tessa Pierce-Ward wrote the manuscript, and all authors reviewed the manuscript.

1134

1135 **Acknowledgments**

1136 We thank R. Hall, W. Rowell, and K.P. Chua for helpful feedback on an early version of this

1137 manuscript.

1138

1139 **LITERATURE CITED**

1140

1141 1. Breitwieser, F.P., Lu, J., and S.L. Salzberg. (2019). A review of methods and databases for  
1142 metagenomic classification and assembly. *Briefings in Bioinformatics*, 20: 1125–1139.

1143 2. Lindgreen, S., Adair, K.L., and P.P. Gardner. (2016) An evaluation of the accuracy and speed  
1144 of metagenome analysis tools. *Scientific Reports*, 6: 19233.

1145 3. McIntyre, A.B.R., Ounit, R., Afshinnkoo, E., Prill, R.J., Hénaff, E., Alexander, N., Minot,  
1146 S.S., Danko, D., Foux, J., Ahsanuddin, S., Tighe, S., Hasan, N.A., Subramanian, P., Moffat,  
1147 K., Levy, S., Lonardi, S., Greenfield, N., Colwell, R.R., Rosen, G.L., and C.E. Mason.  
1148 (2017). Comprehensive benchmarking and ensemble approaches for metagenomic classifiers.  
1149 *Genome Biology*, 18: 182.

1150 4. Sczyrba, A., Hofmann, P., Belmann, P., Koslicki, D., Janssen, S., Dröge, J., Gregor, I., Majda,  
1151 S., Fiedler, J., Dahms, E., Bremges, A., Fritz, A., Garrido-Oter, R., Jørgensen, T.S.S.,  
1152 Shapiro, N., Blood, P.D., Gurevich, A., Bai, Y., Turaev, D., DeMaere, M.Z., Chikhi, R.,  
1153 Nagarajan, N., Quince, C., Meyer, F., Balvočiūtė, M., Hansen, L.H.H., Sørensen, S.J., Chia,  
1154 B.K.H., Denis, B., Froula, J.L., Wang, Z., Egan, R., Don Kang, D., Cook, J.J., Deltel, C.,  
1155 Beckstette, M., Lemaitre, C., Peterlongo, P., Rizk, G., Lavenier, D., Wu, Y.-W.W., Singer,  
1156 S.W., Jain, C., Strous, M., Klingenberg, H., Meinicke, P., Barton, M.D., Lingner, T., Lin, H.-  
1157 H.H., Liao, Y.-C.C., Silva, G.G.G.Z., Cuevas, D.A., Edwards, R.A., Saha, S., Piro, V.C.,  
1158 Renard, B.Y., Pop, M., Klenk, H.-P.P., Göker, M., Kyrpides, N.C., Woyke, T., Vorholt, J.A.,  
1159 Schulze-Lefert, P., Rubin, E.M., Darling, A.E., Rattei, T., and A.C. McHardy. (2017) Critical  
1160 assessment of metagenome interpretation - a benchmark of metagenomics software. *Nature*  
1161 *Methods*, 14: 1063–1071.

- 1162 5. Escobar-Zepeda, A., Godoy-Lozano, E.E., Raggi, L., Segovia, L., Merino, E., Gutiérrez-Rios,  
1163 R.M., Juarez, K., Licea-Navarro, A.F., Pardo-Lopez, L., and A. Sanchez-Flores. (2018).  
1164 Analysis of sequencing strategies and tools for taxonomic annotation: defining standards for  
1165 progressive metagenomics. *Scientific Reports*, 8: 12034.
- 1166 6. Meyer, F., Bremges, A., Belmann, P., Janssen, S., McHardy, A.C., and D. Koslicki. (2019).  
1167 Assessing taxonomic metagenome profiles with OPAL. *Genome Biology*, 20: 51.
- 1168 7. Tamames, J., Cobo-Simón, M., and F. Puente-Sánchez. (2019). Assessing the performance of  
1169 different approaches for functional and taxonomic annotation of metagenomes. *BMC*  
1170 *Genomics*, 20: 960.
- 1171 8. Ye, S.H., Siddle, K.J., Park, D.J., and P.C. Sabeti. (2019). Benchmarking metagenomics tools  
1172 for taxonomic classification. *Cell*. 178: 779–794.
- 1173 9. Parks, D.H., Rigato, F., Vera-Wolf, P., Krause, L., Hugenholtz, P., Tyson, G.W., and D.L.A.  
1174 Wood. (2021). Evaluation of the microba community profiler for taxonomic profiling of  
1175 metagenomic datasets from the human gut microbiome. *Frontiers in Microbiology*, 12:  
1176 643682.
- 1177 10. Meyer, F., Fritz, A., Deng, Z.-L., Koslicki, D., Lesker, T.L., Gurevich, A., Robertson, G.,  
1178 Alser, M., Antipov, D., Beghini, F., Bertrand, D., Brito, J.J., Brown, C.T., Buchmann, J.,  
1179 Buluç, A., Chen, B., Chikhi, R., Clausen, P.T.L.C., Cristian, A., Dabrowski, P.W., Darling,  
1180 A.E., Egan, R., Eskin, E., Georganas, E., Goltsman, E., Gray, M.A., Hansen, L.H., Hofmeyr,  
1181 S., Huang, P., Irber, L., Jia, H., Jørgensen, T.S., Kieser, S.D., Klemetsen, T., Kola, A.,  
1182 Kolmogorov, M., Korobeynikov, A., Kwan, J., LaPierre, N., Lemaitre, C., Li, C., Limasset,  
1183 A., Malcher-Miranda, F., Mangul, S., Marcelino, V.R., Marchet, C., Marijon, P., Meleshko,  
1184 D., Mende, D.R., Milanese, A., Nagarajan, N., Nissen, J., Nurk, S., Olike, L., Paoli, L.,

- 1185 Peterlongo, P., Piro, V.C., Porter, J.S., Rasmussen, S., Rees, E.R., Reinert, K., Renard, B.,  
1186 Robertsen, E.M., Rosen, G.L., Ruscheweyh, H.-J., Sarwal, V., Segata, N., Seiler, E., Shi, L.,  
1187 Sun, F., Sunagawa, S., Sørensen, S.J., Thomas, A., Tong, C., Trajtkovski, M., Tremblay, J.,  
1188 Uritskiy, G., Vicedomini, R., Wang, Z., Wang, Z., Wang, Z., Warren, A., Willassen, N.P.,  
1189 Yelick, K., You, R., Zeller, G., Zhao, Z., Zhu, S., Zhu, J., Garrido-Oter, R., Gastmeier, P.,  
1190 Hacquard, S., Häußler, S., Khaledi, S., Maechler, F., Mesny, F., Radutoiu, S., Schulze-Lefert,  
1191 P., Smit, N., Strowig, T., Bremges, A., Sczyrba, A., and A.C. McHardy. (2022). Critical  
1192 assessment of metagenome interpretation: the second round of challenges. *Nature Methods*,  
1193 19: 420–440.
- 1194 11. Wenger, A.M., Peluso, P., Rowell, W.J., Chang, P.-C., Hall, R.J., Concepcion, G.T., Ebler,  
1195 J., Functammasan, A., Kolesnikov, A., Olson, N.D., Töpfer, A., Alonge, M., Mahmoud, M.,  
1196 Qian, Y., Chin, C.-S., Phillippy, A.M., Schatz, M.C., Myers, G., DePristo, M.A., Ruan, J.,  
1197 Marschall, T., Sedlazeck, F.J., Zook, J.M., Li, H., Koren, S., Carroll, A., Rank, D.A., and  
1198 M.W. Hunkapiller. (2019). Accurate circular consensus long-read sequencing improves  
1199 variant detection and assembly of a human genome. *Nature Biotechnology*, 37: 1155–1162.
- 1200 12. Dilthey, A.T., Jain, C., Koren, S., and A.M. Phillippy. (2019). Strain-level metagenomic  
1201 assignment and compositional estimation for long reads with MetaMaps. *Nature*  
1202 *Communications*, 10: 3066.
- 1203 13. Huson, D.H., Beier, S., Flade, I., Górška, A., El-Hadidi, M., Mitra, S., Ruscheweyh, H.-J.,  
1204 and R. Tappu. (2016). MEGAN Community Edition – interactive exploration and analysis of  
1205 large-scale microbiome sequencing data. *PLOS Computational Biology*, 12: e1004957.
- 1206 14. Mirdita, M., Steinegger, M., Breitwieser, F., Söding, J., and E.L. Karin. (2021). Fast and  
1207 sensitive taxonomic assignment to metagenomic contigs. *Bioinformatics*, 2021: 1–3.

- 1208 15. Fan, J., Huang, S., and S.D. Chorlton. (2021). BugSeq: a highly accurate cloud platform for  
1209 long-read metagenomic analyses. *BMC Bioinformatics*, 22: 160.
- 1210 16. Leidenfrost, R.M., Pöther, D.-C., Jäckel, U., and R. Wünschiers. (2020). Benchmarking the  
1211 MinION: evaluating long reads for microbial profiling. *Scientific Reports*, 10: 5125.
- 1212 17. Pearman, W.S., Freed, N.E., and O.K. Silander. (2020). Testing the advantage and  
1213 disadvantages of short- and long-read eukaryotic metagenomics using simulated reads. *BMC*  
1214 *Bioinformatics*, 21: 220.
- 1215 18. Marić, J., Križanović, K., Riondet, S., Nagarajan, N., and M. Šikić. (2020). Benchmarking  
1216 metagenomic classification tools for long-read sequencing data. *bioRxiv*,  
1217 <https://doi.org/10.1101/2020.11.25.397729>.
- 1218 19. Govender, K.N., and D.W. Eyre. (2022). Benchmarking taxonomic classifiers with Illumina  
1219 and Nanopore sequence data for clinical metagenomic diagnostic applications. *Microbial*  
1220 *Genomics*, 8: 000886.
- 1221 20. Nicholls, S.M., Quick, J.C., Tang, S., and N.J. Loman. (2019). Ultra-deep, long-read  
1222 nanopore sequencing of mock microbial community standards. *GigaScience*, 8: 1–9.
- 1223 21. De Coster, W., D’Hert, S., Schultz, D.T., Cruts, M., and C. Van Broeckhoven. (2018).  
1224 NanoPack: visualizing and processing long-read sequencing data. *Bioinformatics*, 34: 2666–  
1225 2669.
- 1226 22. Sui, H.-Y., Weil, A.A., Nuwagira, E., Qadri, F., Ryan, E.T., Mezzari, M.P., Phipatanakul,  
1227 W., and P.S. Lai. (2020). Impact of DNA extraction method on variation in human and built  
1228 environment microbial community and functional profiles assessed by shotgun  
1229 metagenomics sequencing. *Frontiers in Microbiology*, 11: 953.

- 1230 23. Wood, D.E., and S.L. Salzberg. (2014). Kraken: ultrafast metagenomic sequence  
1231 classification using exact alignments. *Genome Biology*, 15: R46.
- 1232 24. Wood, D.E., Lu, J., and B. Langmead. (2019). Improved metagenomic analysis with Kraken  
1233 2. *Genome Biology*, 20: 257.
- 1234 25. Lu, J., Breitwieser, F.P., Thielen, P., and S.L. Salzberg. (2017). Bracken: estimating species  
1235 abundance in metagenomics data. *PeerJ Computer Science*, 3: e104.
- 1236 26. Kim, D., Song, L., Breitwieser, F.P., and S.L. Salzberg. (2016). Centrifuge: rapid and  
1237 sensitive classification of metagenomic sequences. *Genome Research*, 26: 1721–1729.
- 1238 27. Beghini, F., McIver, L.J., Blanco-Miguez, A., Dubois, L., Asnicar, F., Maharjan, S., Mailyan,  
1239 A., Thomas, A.M., Manghi, P., Valles-Colomer, M., Weingart, G., Zhang, Y., Zolfo, M.,  
1240 Huttenhower, C., Franzosa, E.A., and N. Segata. (2021). Integrating taxonomic, functional,  
1241 and strain-level profiling of diverse microbial communities with bioBakery 3. *eLife*,  
1242 10:e65088.
- 1243 28. Milanese, A., Mende, D.R., Paoli, L., Salazar, G., Ruscheweyh, H.-J., Cuenca, M., Hingamp,  
1244 P., Alves, R., Costea, P.I., Coelho, L.P., Schmidt, T.S.B., Almeida, A., Mitchell, A.L., Finn,  
1245 R.D., Huerta-Cepas, J., Bork, P., Zeller, G., and S. Sunagawa. (2019). Microbial abundance,  
1246 activity and population genomic profiling with mOTUs2. *Nature Communications*, 10: 1014.
- 1247 29. Huson, D.H., Albrecht, B., Bağci, C., Bessarab, I., Górska, A., Jolic, D., and R.B.H.  
1248 Williams. (2018). MEGAN-LR: new algorithms allow accurate binning and easy interactive  
1249 exploration of metagenomic long reads and contigs. *Biology Direct*, 13: 6.
- 1250 30. Buchfink, B., Xie, C., and D.H. Huson. (2015) Fast and sensitive protein alignment using  
1251 DIAMOND. *Nature Methods*, 12: 59–60.



- 1252 31. Arumugam, K., Bağci, C., Bessarab, I., Beier, S., Buchfink, B., Górska, A., Qiu, G., Huson,  
1253 D.H., and R.B.H. Williams. (2019). Annotated bacterial chromosomes from frame-shift-  
1254 corrected long-read metagenomic data. *Microbiome*, 7: 61.
- 1255 32. Li, H. (2018). Minimap2: pairwise alignment for nucleotide sequences. *Bioinformatics*, 34:  
1256 3094–3100.
- 1257 33. Brown, C.T., and L. Irber. (2016). sourmash: a library for MinHash sketching of DNA.  
1258 *Journal of Open Source Software*, 1: 27.
- 1259 34. Pierce, N.T., Irber, L., Reiter, T., Brooks, P., and C.T. Brown. (2019). Large-scale sequence  
1260 comparisons with *sourmash*. *F1000Research*, 8: 1006.
- 1261 35. Irber, L., Brooks, P.T., Reiter, T., Pierce-Ward, N.T., Hera, M.R., Koslicki, D., and C.T.  
1262 Brown. (2022). Lightweight compositional analysis of metagenomes with FracMinHash and  
1263 minimum metagenome covers. *bioRxiv*, <https://doi.org/10.1101/2022.01.11.475838>
- 1264 36. Koslicki, D., and D. Falush. (2016). MetaPalette: a k-mer painting approach for metagenomic  
1265 profiling and quantification of novel strain variation. *mSystems*, 1: e00020-16.
- 1266

1267 **Figure 1.** Violin plots showing the read length distributions for the four mock community  
1268 datasets included in this study, after length-filtering was applied to remove shorter reads (see  
1269 methods). Interiors of plots contain white dots representing median values, black bars represent  
1270 interquartile values, and black lines represent minimum and maximum range values. Read sizes  
1271 range up to 50,000 bp in length, but the plot is clipped at 25,000 bp to show the core size  
1272 distributions.

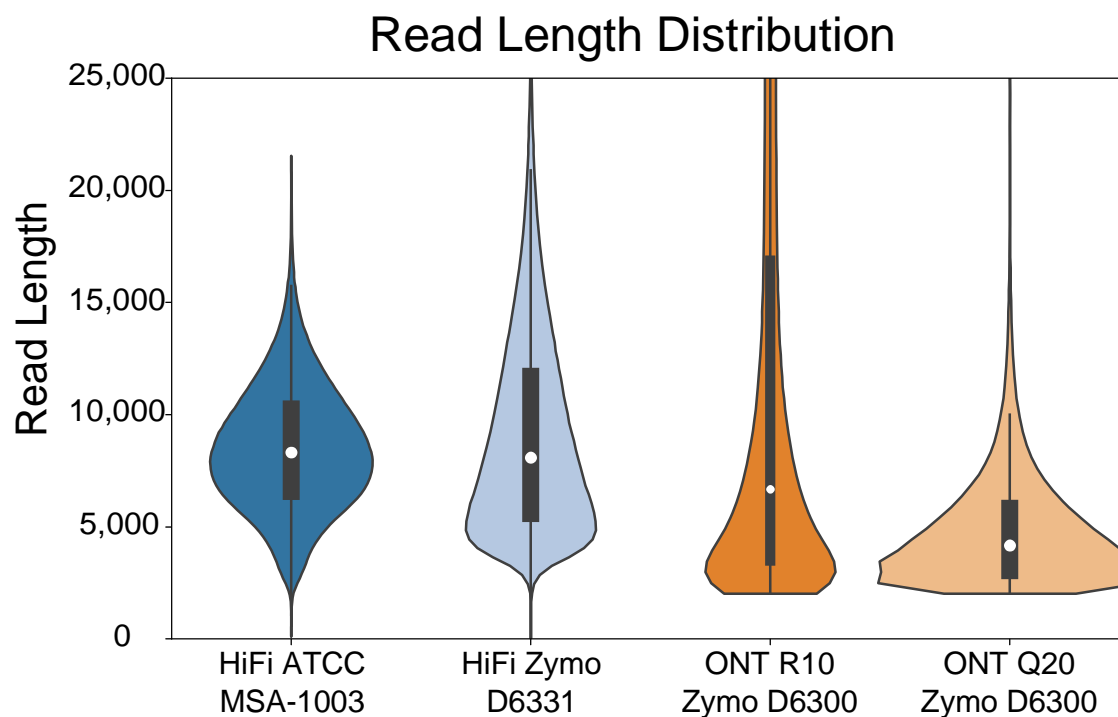

1273

1274 **Figure 2.** Read utilization for (A) HiFi ATCC MSA-1003, (B) HiFi Zymo D6331, (C) ONT R10  
 1275 Zymo D6300, and (D) ONT Q20 Zymo D6300. The stacked barplots show the total percent of  
 1276 reads that were assigned to taxonomy. Different colors show the percentage of reads assigned to  
 1277 specific taxonomic ranks.

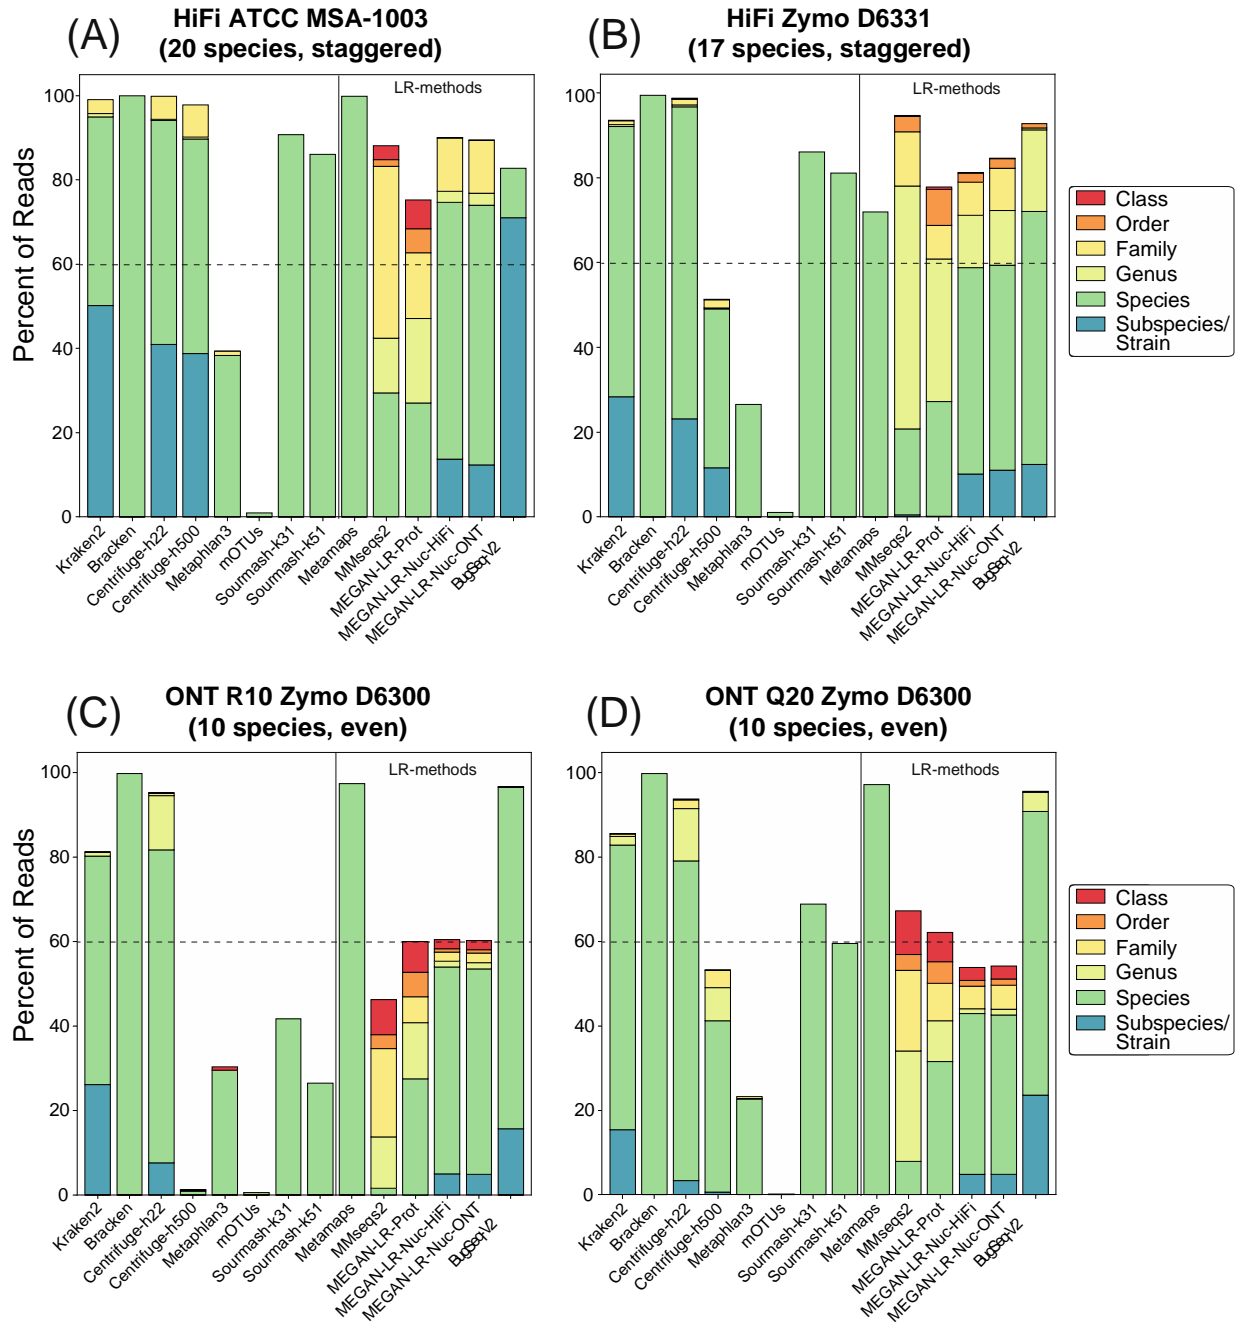

1278

**Figure 3.** Precision, recall and F-scores for the species-level analysis based on a minimum threshold of 0.001% of the total reads for (A) HiFi ATCC MSA-1003, (B) HiFi Zymo D6331, (C) ONT R10 Zymo D6300, and (D) ONT Q20 Zymo D6300.

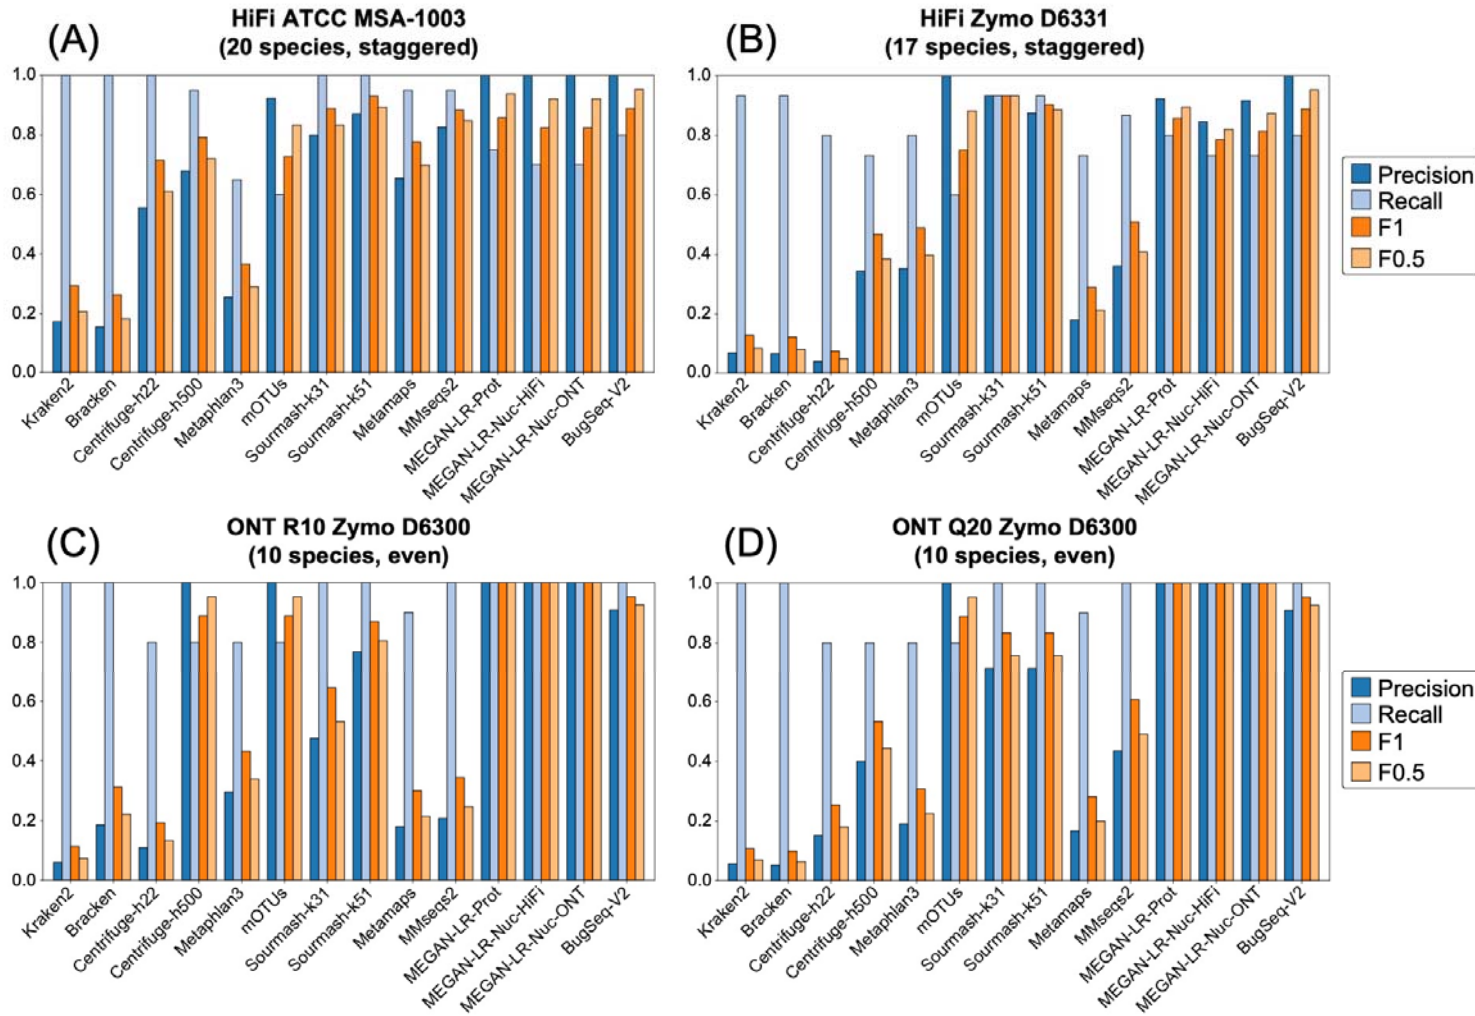

**Figure 4.** The average values for (A) precision and recall, (B) F1 scores, and (C) F0.5 scores for the species-level analysis based on a minimum threshold of 0.001% of the total reads. Methods to the right of the vertical line in (B) and (C) are the long-read classifiers.

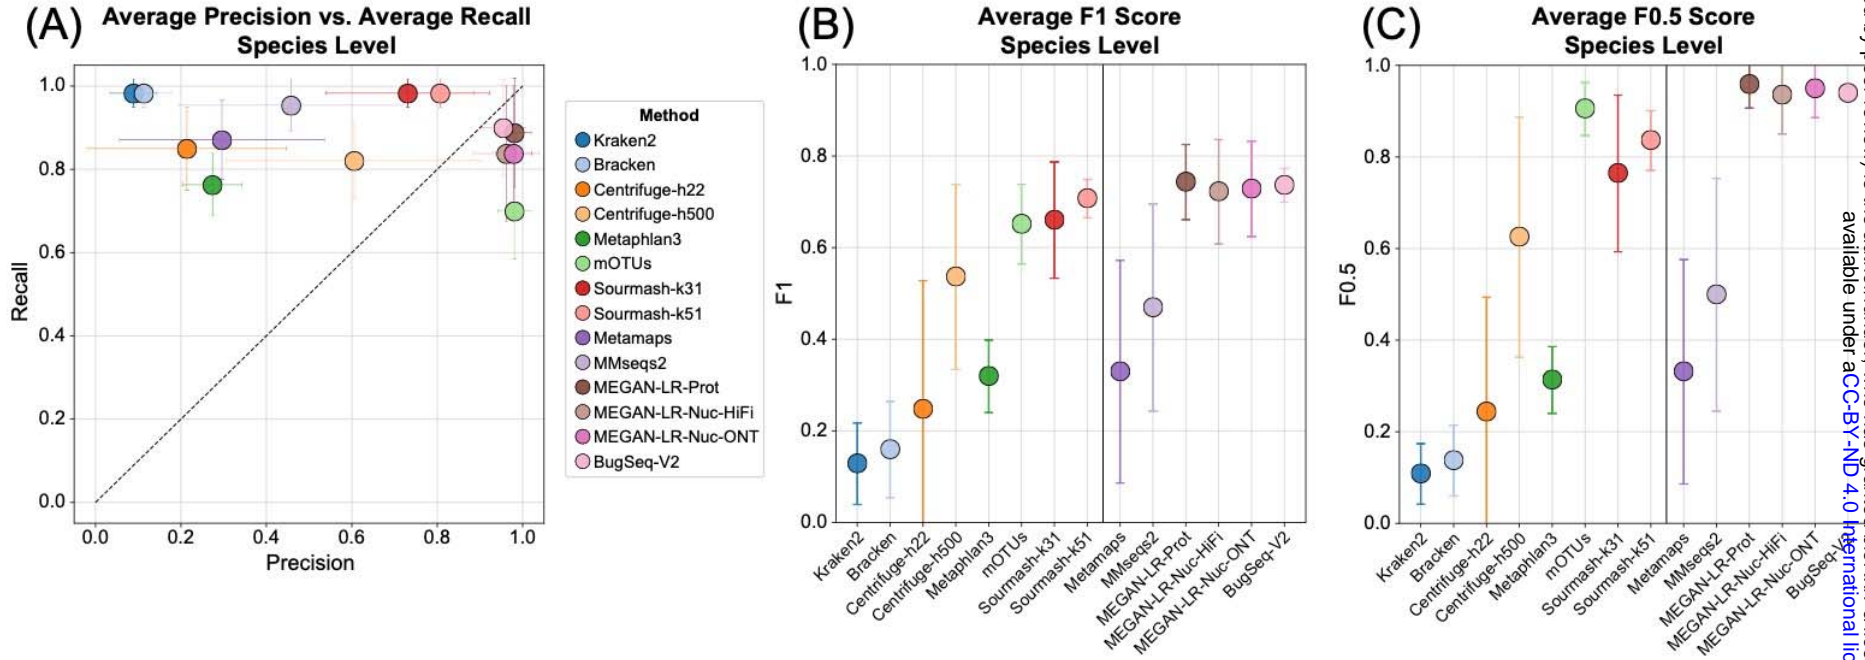

**Figure 5.** Precision, recall and F-scores for the genus-level analysis based on a minimum threshold of 0.001% of the total reads for (A) HiFi ATCC MSA-1003, (B) HiFi Zymo D6331, (C) ONT R10 Zymo D6300, and (D) ONT Q20 Zymo D6300.

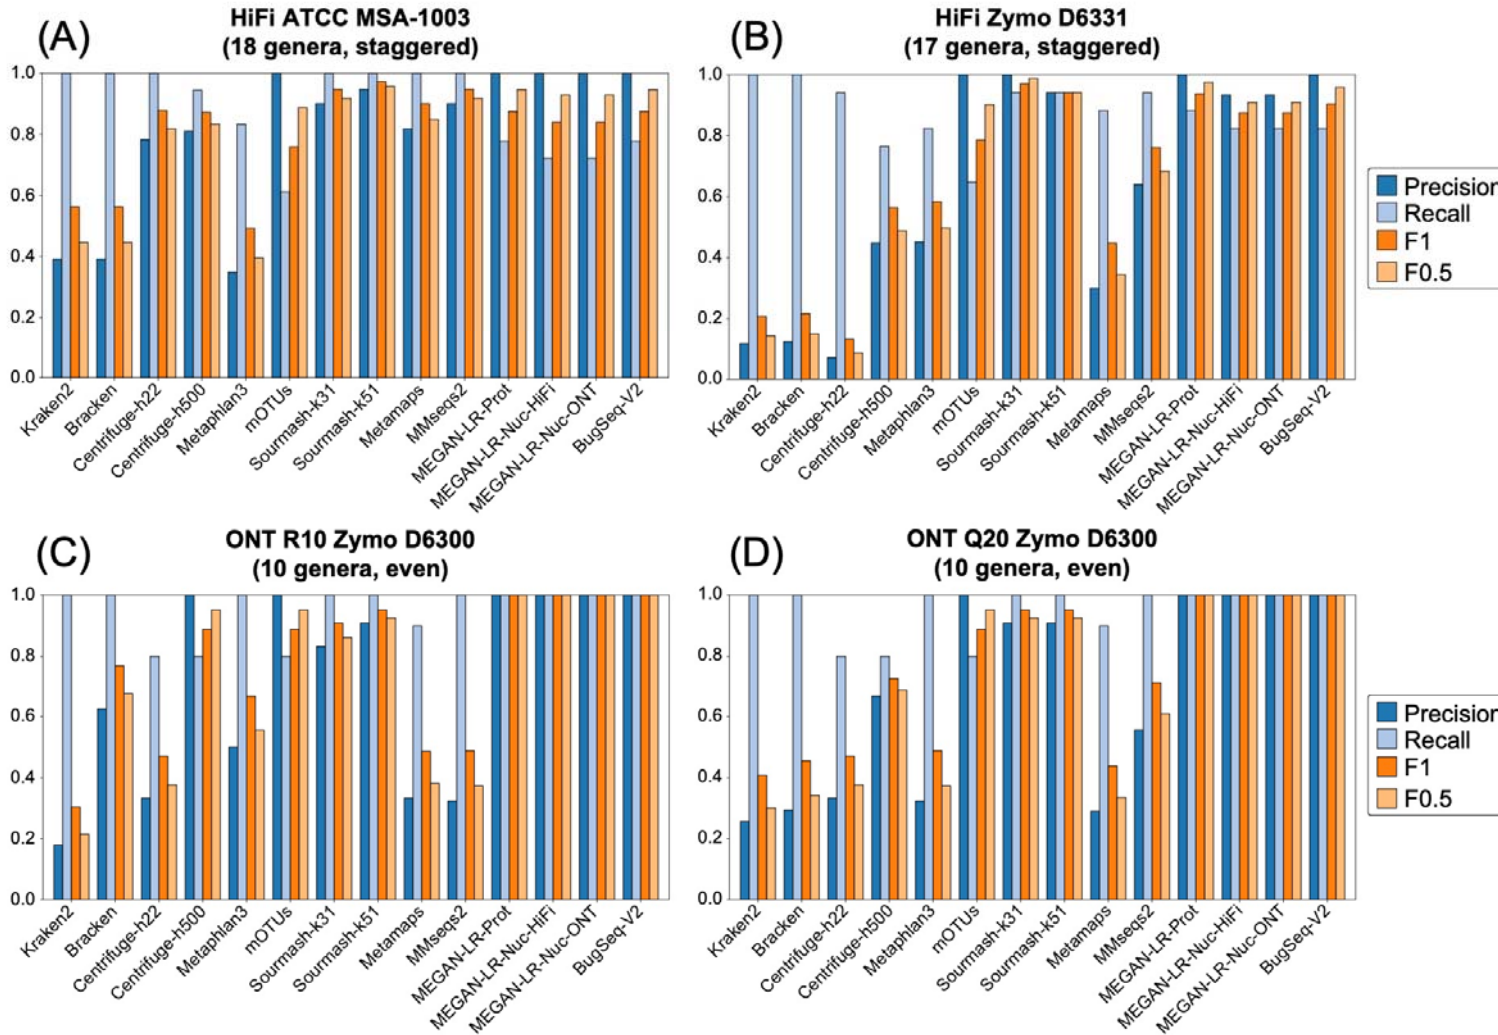

**Figure 6.** The average values for (A) precision and recall, (B) F1 scores, and (C) F0.5 scores for the genus-level analysis based on a minimum threshold of 0.001% of the total reads. Methods to the right of the vertical line in (B) and (C) are the long-read classifiers.

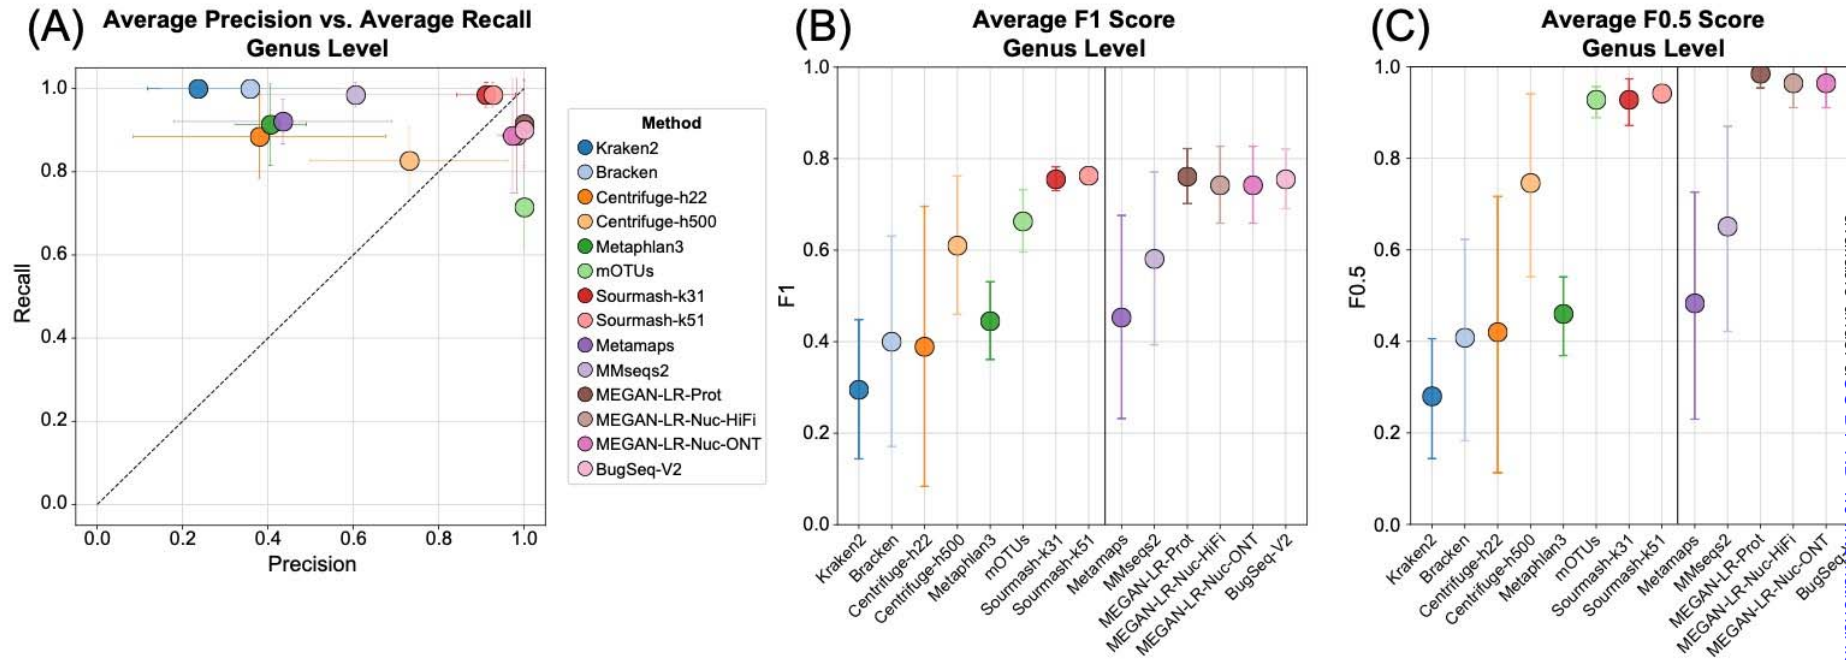

**Figure 7.** Species-level relative abundance estimates for (A) HiFi ATCC MSA-1003, (B) HiFi Zymo D6331, (C) ONT R10 Zymo D6300, and (D) ONT Q20 Zymo D6300. The theoretical distributions are shown on the left and are based on the manufacturer’s specifications. The read counts for all species-level false positives were grouped in a category labeled ‘Other’. For HiFi Zymo D6331, all species assignments within the genera *Prevotella* and *Veillonella* were counted towards *Prevotella corporis* and *Veillonella rogosae*, due to the absence of these species from several databases (see methods). Asterisks signify methods that failed the chi-squared goodness of fit test (e.g., the abundance estimates were significantly different from the theoretical values).

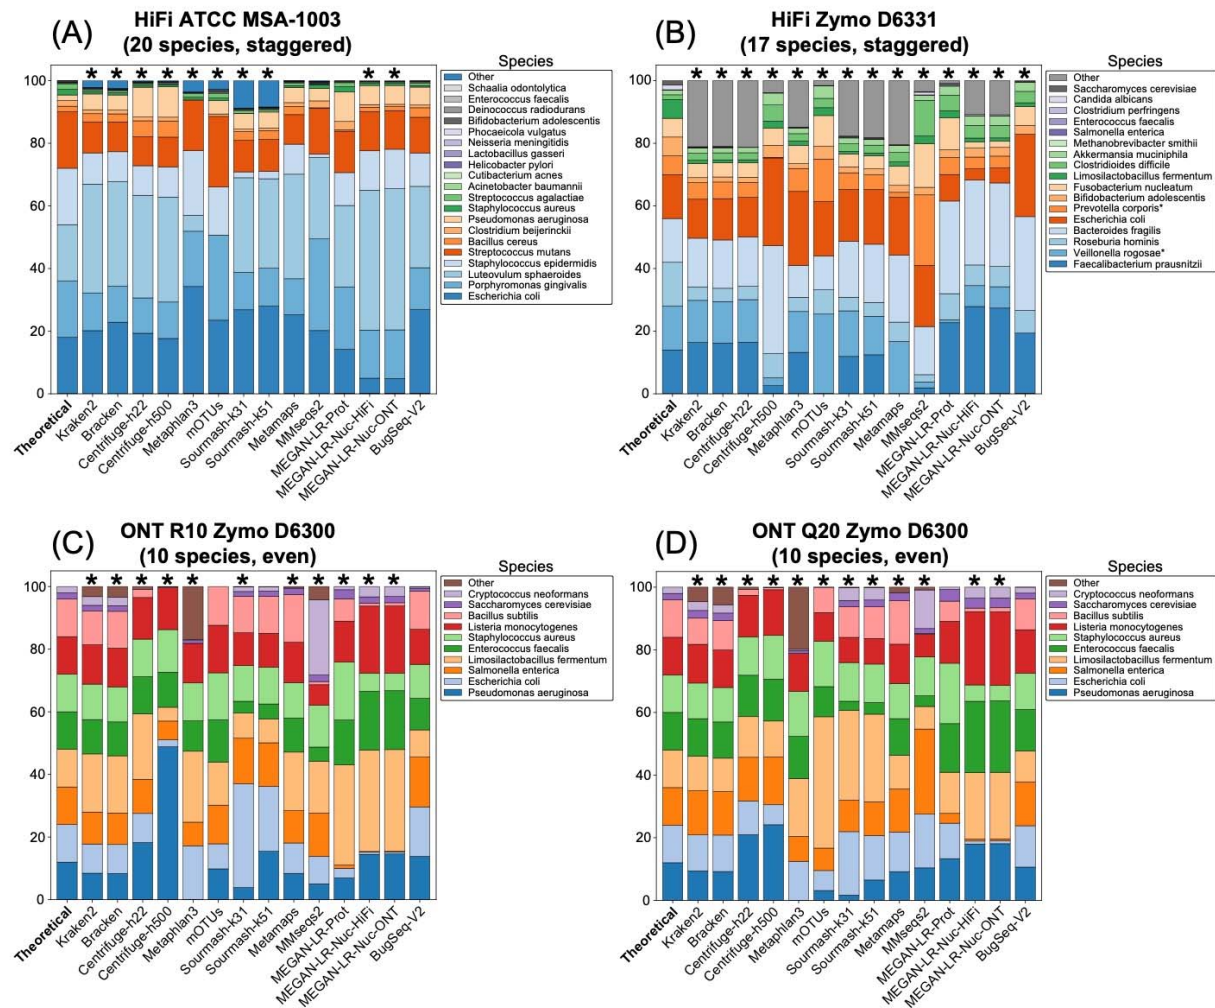



**Figure 8.** Genus-level relative abundance estimates for (A) HiFi ATCC MSA-1003, (B) HiFi Zymo D6331, (C) ONT R10 Zymo D6300, and (D) ONT Q20 Zymo D6300. The theoretical distributions are shown on the left and are based on the manufacturer’s specifications. The read counts for all genus-level false positives were grouped in a category labeled ‘Other’. Asterisks signify methods that failed the chi-squared goodness of fit test (e.g., the abundance estimates were significantly different from the theoretical values).

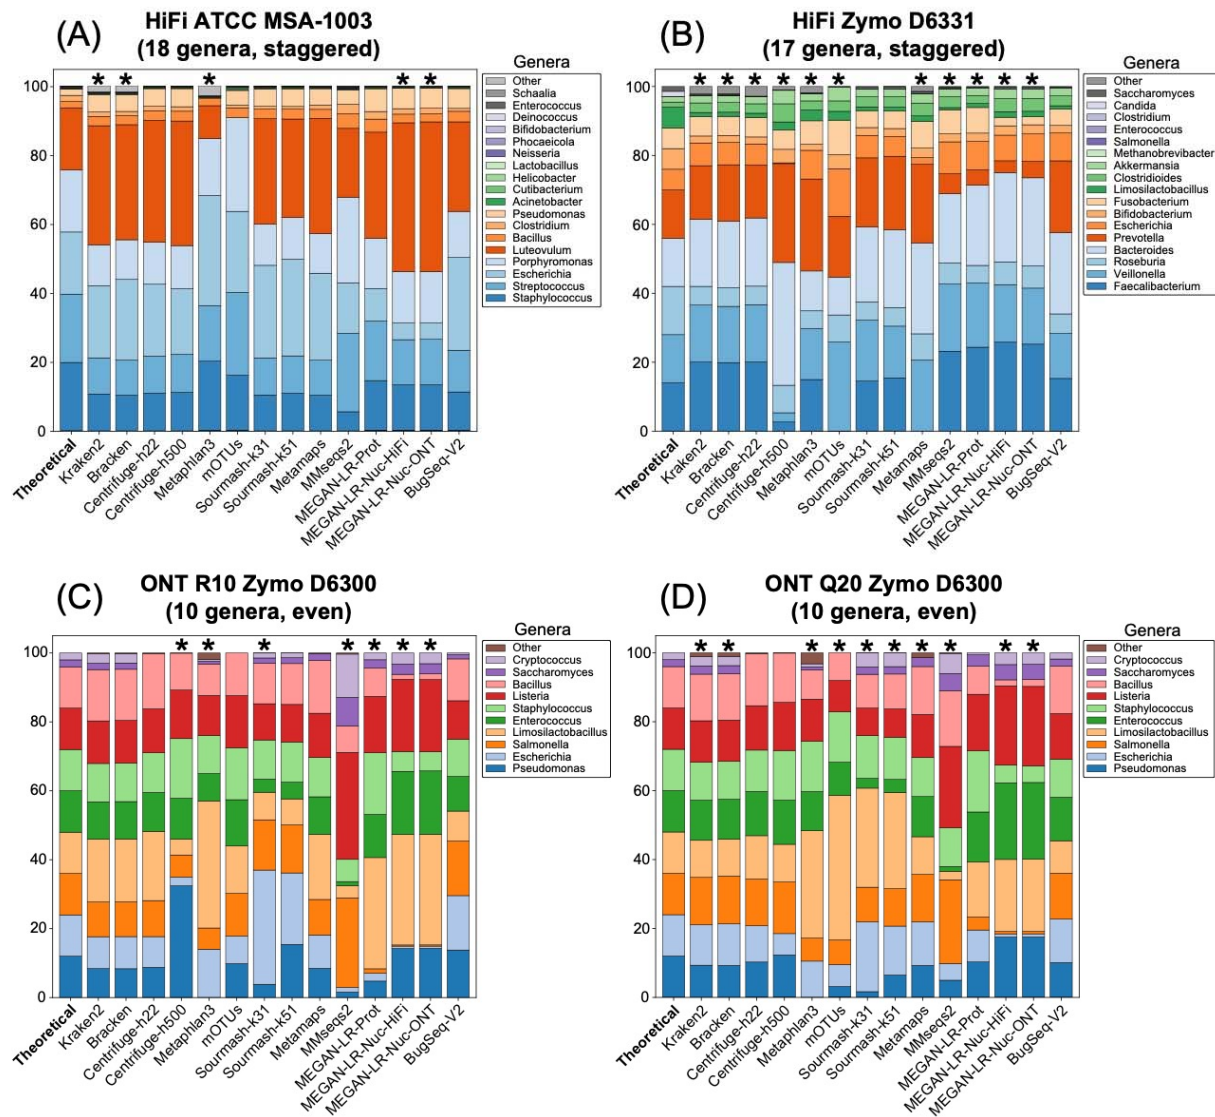

**Figure 9.** Results for the two Illumina short-read datasets. Precision, recall and F-scores for the species-level analysis based on a minimum threshold of 0.001% of the total reads for (A) Illumina ATCC MSA-1003 and (B) Illumina Zymo D6300. Species-level relative abundance estimates for (C) Illumina ATCC MSA-1003 and (D) Illumina Zymo D6300. The theoretical distributions are shown on the left and are based on the manufacturer’s specifications. The read counts for all species-level false positives were grouped in a category labeled ‘Other’. Asterisks signify methods that failed the chi-squared goodness of fit test.

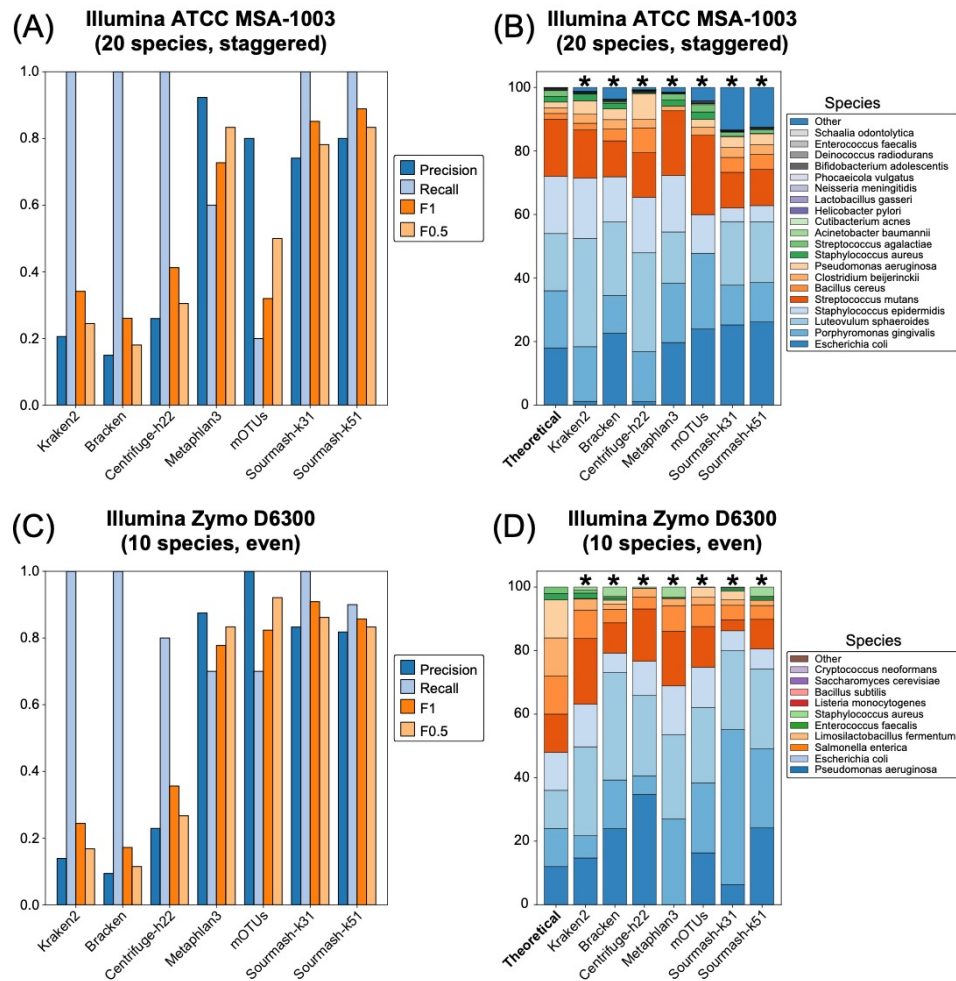

**Figure 10.** Results for the two Illumina short-read datasets. The average values for (A) precision and recall, (B) F1 scores, and (C) F0.5 scores for the species-level analysis based on a minimum threshold of 0.001% of the total reads.

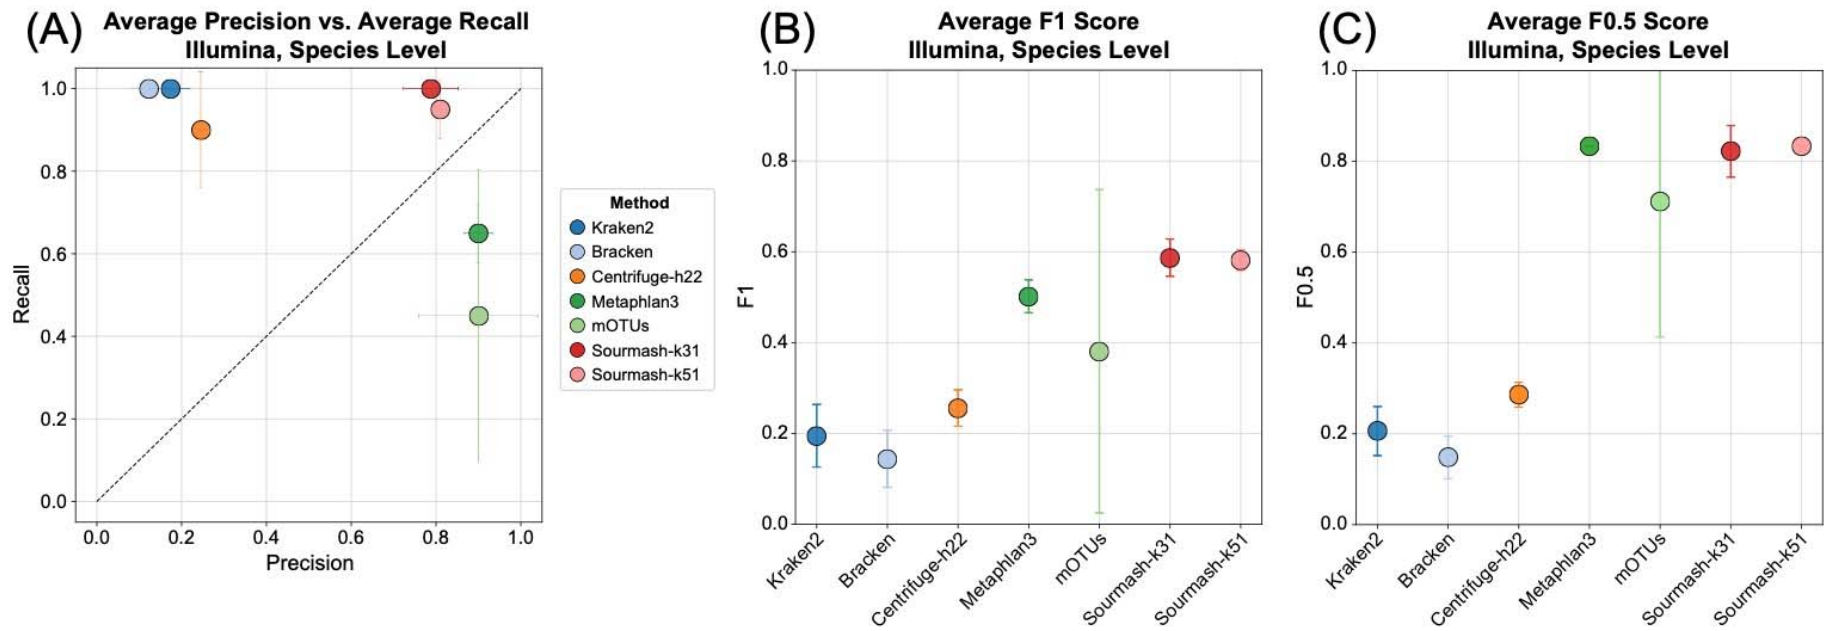

Table 1. Description of the publicly available mock community datasets used for this experiment.

| Label                  | Technology                   | Mock Community    | Species         | Abundances             | Reads Used              | Median Length | Mean Length | Total Bases | Median QV | Release Date | Source                                                                                                            |
|------------------------|------------------------------|-------------------|-----------------|------------------------|-------------------------|---------------|-------------|-------------|-----------|--------------|-------------------------------------------------------------------------------------------------------------------|
| HiFi ATCC MSA-1003     | PacBio HiFi                  | ATCC MSA-1003     | 20 <sup>a</sup> | Staggered (14–0.02%)   | 2,419,037               | 8,310         | 8,492       | 20.54 Gb    | 36        | 6/4/19       | NCBI: SRX6095783                                                                                                  |
| HiFi Zymo D6331        | PacBio HiFi                  | ZymoBIOMICS D6331 | 17 <sup>b</sup> | Staggered (18–0.0001%) | 1,978,852               | 8,077         | 9,092       | 17.99 Gb    | 40        | 11/25/20     | NCBI: SRX9569057                                                                                                  |
| ONT R10 Zymo D6300     | Oxford Nanopore Technologies | ZymoBIOMICS D6300 | 10 <sup>c</sup> | Even (12%, 2%)         | 275,318 <sup>d</sup>    | 6,664         | 12,022      | 3.31 Gb     | 10        | 2/7/20       | <a href="https://lomanlab.github.io/mockcommunity/r10.html">https://lomanlab.github.io/mockcommunity/r10.html</a> |
| ONT Q20 Zymo D6300     | Oxford Nanopore Technologies | ZymoBIOMICS D6300 | 10 <sup>c</sup> | Even (12%, 2%)         | 2,000,000 <sup>d</sup>  | 4,160         | 4,805       | 9.61 Gb     | N/A       | 3/23/21      | ENA: ERR5396170                                                                                                   |
| Illumina ATCC MSA-1003 | Illumina                     | ATCC MSA-1003     | 20 <sup>a</sup> | Staggered (14–0.02%)   | 10,038,314              | 125           | 125         | 1.25 Gb     | 37        | 12/2018      | NCBI: SRX5169925                                                                                                  |
| Illumina Zymo D6300    | Illumina                     | ZymoBIOMICS D6300 | 10 <sup>c</sup> | Even (12%, 2%)         | 20,000,000 <sup>e</sup> | 150           | 150         | 2.99 Gb     | 37        | 7/2020       | NCBI: SRX8824472                                                                                                  |

**a:** 20 bacteria; **b:** 14 bacteria, 1 archaea, 2 yeasts; **c:** 8 bacteria (at 12% abundance), 2 yeasts (at 2% abundance); **d:** length-filtered to eliminate reads < 2 kb and > 50 kb from starting set of 1.16 million reads (ONT R10) and 5.4 million reads (ONT Q20); **e:** subsampled from ~103 million available reads.

Table 2. Overview of taxonomic profiling methods used in this experiment.

| <b>Intended Use</b> | <b>Method</b> | <b>Variations</b> | <b>Reference Database</b> | <b>Strategy</b>                      |
|---------------------|---------------|-------------------|---------------------------|--------------------------------------|
| Short reads         | Kraken2       | -                 | “PlusPF”                  | K-mer-based                          |
|                     | Bracken       | -                 | “PlusPF”                  | Bayesian Refinement                  |
|                     | Centrifuge    | h22, h500         | Refseq ABVF               | BW transform, FM-index               |
|                     | MetaPhlan3    | -                 | mpa_v30_CHOCOPlan_201901  | Read mapping, coverage scores        |
|                     | mOTUs2        | -                 | V3.0.3                    | Read mapping                         |
| General             | sourmash      | k31, k51          | GenBank                   | K-mer min-set-cov; LCA algorithm     |
| Long reads          | MetaMaps      | -                 | MiniSeq+H                 | Approximate mapping                  |
|                     | MMseqs2       | -                 | NCBI nr                   | Translation alignment, LCA algorithm |
|                     | MEGAN-LR-prot | -                 | NCBI nr                   | Translation alignment, LCA algorithm |
|                     | MEGAN-LR-nuc  | HiFi, ONT         | NCBI nt                   | Nucleotide alignment, LCA algorithm  |
|                     | BugSeq-V2     | -                 | NCBI nt                   | Nucleotide alignment, LCA algorithm  |

Table 3. Minimum detection thresholds used to score the presence/absence of mock community taxa at the species or genus level.

| <b>Dataset</b>        | <b>Number of Reads</b> | <b>0.001% Threshold</b> | <b>0.1% Threshold</b> | <b>1% Threshold</b> |
|-----------------------|------------------------|-------------------------|-----------------------|---------------------|
| HiFi ATCC MSA-1003    | 2,419,037              | 24                      | 2,419                 | 24,190              |
| HiFi Zymo D6331       | 1,978,852              | 19                      | 1,978                 | 19,788              |
| ONT R10 Zymo D6300    | 275,318                | 2                       | 275                   | 2,753               |
| ONT Q20 Zymo D6300    | 2,000,000              | 20                      | 2,000                 | 20,000              |
| Illumina ATCC MSA1003 | 10,038,314             | 100                     | 10,038                | 100,383             |
| Illumina Zymo D6300   | 20,000,000             | 200                     | 20,000                | 200,000             |

Table 4. Species-level detection results based on the minimum 0.001% of total reads threshold.

| Dataset                                          | Method Type | Profiling Method                           | True Positives | False Positives | False Negatives | Precision | Recall | F <sub>1</sub> | F <sub>0.5</sub> | L1   |      |      |
|--------------------------------------------------|-------------|--------------------------------------------|----------------|-----------------|-----------------|-----------|--------|----------------|------------------|------|------|------|
| HiFi ATCC MSA1003<br>(20 species, staggered)     | Short read  | Kraken2                                    | 20             | 96              | 0               | 0.17      | 1.00   | 0.29           | 0.21             | 50.7 |      |      |
|                                                  |             | Bracken                                    | 20             | 112             | 0               | 0.15      | 1.00   | 0.26           | 0.18             | 53.3 |      |      |
|                                                  |             | Centrifuge-h22                             | 20             | 16              | 0               | 0.56      | 1.00   | 0.71           | 0.61             | 55.1 |      |      |
|                                                  |             | Centrifuge-h500                            | 19             | 9               | 1               | 0.68      | 0.95   | 0.79           | 0.72             | 54.5 |      |      |
|                                                  |             | MetaPhlAn3                                 | 13             | 38              | 7               | 0.26      | 0.65   | 0.37           | 0.29             | 45.2 |      |      |
|                                                  |             | mOTUs                                      | 12             | 1               | 8               | 0.92      | 0.60   | 0.73           | 0.83             | 50.2 |      |      |
|                                                  | General     | Sourmash-k31                               | 20             | 5               | 0               | 0.80      | 1.00   | 0.89           | 0.83             | 68.6 |      |      |
|                                                  |             | Sourmash-k51                               | 20             | 3               | 0               | 0.87      | 1.00   | 0.93           | 0.89             | 67.0 |      |      |
|                                                  | Long read   | MetaMaps                                   | 19             | 10              | 1               | 0.66      | 0.95   | 0.78           | 0.70             | 53.1 |      |      |
|                                                  |             | MMseqs2                                    | 19             | 4               | 1               | 0.83      | 0.95   | 0.88           | 0.85             | 48.8 |      |      |
|                                                  |             | MEGAN-LR-Prot                              | 15             | 0               | 5               | 1.00      | 0.75   | 0.85           | 0.94             | 37.0 |      |      |
|                                                  |             | MEGAN-LR-Nuc-HiFi                          | 14             | 0               | 6               | 1.00      | 0.70   | 0.82           | 0.92             | 62.1 |      |      |
|                                                  |             | MEGAN-LR-Nuc-ONT                           | 14             | 0               | 6               | 1.00      | 0.70   | 0.82           | 0.92             | 62.7 |      |      |
|                                                  |             | BugSeq-V2                                  | 16             | 0               | 4               | 1.00      | 0.80   | 0.89           | 0.95             | 44.4 |      |      |
| Illumina ATCC MSA1003<br>(20 species, staggered) | Short read  | Kraken2                                    | 20             | 77              | 0               | 0.21      | 1.00   | 0.34           | 0.24             | 44.8 |      |      |
|                                                  |             | Bracken                                    | 20             | 113             | 0               | 0.15      | 1.00   | 0.26           | 0.18             | 36.4 |      |      |
|                                                  |             | Centrifuge-h22                             | 20             | 57              | 0               | 0.26      | 1.00   | 0.41           | 0.31             | 54.2 |      |      |
|                                                  |             | MetaPhlAn3                                 | 12             | 1               | 8               | 0.92      | 0.60   | 0.73           | 0.83             | 12.7 |      |      |
|                                                  |             | mOTUs                                      | 4              | 1               | 16              | 0.80      | 0.20   | 0.32           | 0.50             | 51.6 |      |      |
|                                                  | General     | Sourmash-k31                               | 20             | 7               | 0               | 0.74      | 1.00   | 0.85           | 0.78             | 57.2 |      |      |
|                                                  |             | Sourmash-k51                               | 20             | 5               | 0               | 0.80      | 1.00   | 0.89           | 0.83             | 55.4 |      |      |
|                                                  |             | HiFi Zymo D6331<br>(17 species, staggered) | Short read     | Kraken2*        | 14              | 196       | 1      | 0.07           | 0.93             | 0.13 | 0.08 | 51.9 |
|                                                  |             |                                            |                | Bracken*        | 14              | 204       | 1      | 0.06           | 0.93             | 0.12 | 0.08 | 51.0 |
|                                                  |             |                                            |                | Centrifuge-h22* | 12              | 307       | 3      | 0.04           | 0.80             | 0.07 | 0.05 | 52.9 |
| Centrifuge-h500*                                 | 11          |                                            |                | 21              | 4               | 0.34      | 0.73   | 0.47           | 0.38             | 88.7 |      |      |

|                                          |            |                    |    |     |   |      |      |      |      |      |
|------------------------------------------|------------|--------------------|----|-----|---|------|------|------|------|------|
|                                          |            | MetaPhlan3*        | 12 | 22  | 3 | 0.35 | 0.80 | 0.49 | 0.40 | 53.8 |
|                                          |            | mOTUs              | 9  | 0   | 6 | 1.00 | 0.60 | 0.75 | 0.88 | 63.6 |
|                                          | General    | Sourmash-k31       | 14 | 1   | 1 | 0.93 | 0.93 | 0.93 | 0.93 | 52.0 |
|                                          |            | Sourmash-k51       | 14 | 2   | 1 | 0.88 | 0.93 | 0.90 | 0.89 | 55.2 |
|                                          | Long read  | MetaMaps*          | 11 | 50  | 4 | 0.18 | 0.73 | 0.29 | 0.21 | 74.9 |
|                                          |            | MMseqs2*           | 13 | 24  | 2 | 0.35 | 0.87 | 0.50 | 0.40 | 90.0 |
|                                          |            | MEGAN-LR-Prot*     | 12 | 1   | 3 | 0.92 | 0.80 | 0.86 | 0.90 | 68.3 |
|                                          |            | MEGAN-LR-Nuc-HiFi* | 11 | 2   | 4 | 0.85 | 0.73 | 0.79 | 0.82 | 83.8 |
|                                          |            | MEGAN-LR-Nuc-ONT*  | 11 | 1   | 4 | 0.92 | 0.73 | 0.81 | 0.87 | 81.8 |
|                                          |            | BugSeq-V2*         | 12 | 0   | 3 | 1.00 | 0.80 | 0.89 | 0.95 | 74.5 |
| ONT R10 Zymo D6300<br>(10 species, even) | Short read | Kraken2            | 10 | 156 | 0 | 0.06 | 1.00 | 0.11 | 0.07 | 22.3 |
|                                          |            | Bracken            | 10 | 44  | 0 | 0.19 | 1.00 | 0.31 | 0.22 | 21.5 |
|                                          |            | Centrifuge-h22     | 8  | 65  | 2 | 0.11 | 0.80 | 0.19 | 0.13 | 34.9 |
|                                          |            | Centrifuge-h500    | 8  | 0   | 2 | 1.00 | 0.80 | 0.89 | 0.95 | 79.7 |
|                                          |            | MetaPhlan3         | 8  | 19  | 2 | 0.30 | 0.80 | 0.43 | 0.34 | 67.1 |
|                                          |            | mOTUs              | 8  | 0   | 2 | 1    | 0.80 | 0.89 | 0.95 | 20.3 |
|                                          | General    | Sourmash-k31       | 10 | 11  | 0 | 0.47 | 1.00 | 0.64 | 0.53 | 47.7 |
|                                          |            | Sourmash-k51       | 10 | 3   | 0 | 0.76 | 1.00 | 0.87 | 0.81 | 28.3 |
|                                          | Long read  | MetaMaps           | 9  | 41  | 1 | 0.18 | 0.90 | 0.30 | 0.21 | 22.8 |
|                                          |            | MMseqs2            | 10 | 38  | 0 | 0.21 | 1.00 | 0.34 | 0.25 | 68.2 |
|                                          |            | MEGAN-LR-Prot      | 10 | 0   | 0 | 1.00 | 1.00 | 1.00 | 1.00 | 61.6 |
|                                          |            | MEGAN-LR-Nuc-HiFi  | 10 | 0   | 0 | 1.00 | 1.00 | 1.00 | 1.00 | 80.6 |
|                                          |            | MEGAN-LR-Nuc-ONT   | 10 | 0   | 0 | 1.00 | 1.00 | 1.00 | 1.00 | 81.0 |
|                                          |            | BugSeq-V2          | 10 | 1   | 0 | 0.91 | 1.00 | 0.95 | 0.93 | 19.4 |
| ONT Q20 Zymo D6300<br>(10 species, even) | Short read | Kraken2            | 10 | 166 | 0 | 0.06 | 1.00 | 0.11 | 0.07 | 16.7 |
|                                          |            | Bracken            | 10 | 184 | 0 | 0.05 | 1.00 | 0.10 | 0.06 | 17.0 |
|                                          |            | Centrifuge-h22     | 8  | 45  | 2 | 0.15 | 0.80 | 0.25 | 0.18 | 30.7 |
|                                          |            | Centrifuge-h500    | 8  | 12  | 2 | 0.40 | 0.80 | 0.53 | 0.44 | 43.0 |
|                                          |            | MetaPhlan3         | 8  | 34  | 2 | 0.19 | 0.80 | 0.31 | 0.22 | 61.5 |



|                                           |                |                   |    |    |      |      |      |      |      |      |
|-------------------------------------------|----------------|-------------------|----|----|------|------|------|------|------|------|
|                                           |                | mOTUs             | 8  | 0  | 2    | 1.00 | 0.80 | 0.89 | 0.95 | 65.1 |
| General                                   |                | Sourmash-k31      | 10 | 4  | 0    | 0.71 | 1.00 | 0.83 | 0.76 | 55.3 |
|                                           |                | Sourmash-k51      | 10 | 4  | 0    | 0.71 | 1.00 | 0.83 | 0.76 | 41.5 |
|                                           | Long read      | MetaMaps          | 9  | 45 | 1    | 0.17 | 0.90 | 0.28 | 0.20 | 14.2 |
| MMseqs2                                   |                | 10                | 13 | 0  | 0.44 | 1.00 | 0.61 | 0.49 | 63.9 |      |
| MEGAN-LR-Prot                             |                | 10                | 0  | 0  | 1.00 | 1.00 | 1.00 | 1.00 | 32.7 |      |
| Illumina Zymo D6300<br>(10 species, even) | Short read     | MEGAN-LR-Nuc-HiFi | 10 | 0  | 0    | 1.00 | 1.00 | 1.00 | 1.00 | 80.0 |
|                                           |                | MEGAN-LR-Nuc-ONT  | 10 | 0  | 0    | 1.00 | 1.00 | 1.00 | 1.00 | 80.5 |
|                                           |                | BugSeq-V2         | 10 | 1  | 0    | 0.91 | 1.00 | 0.95 | 0.93 | 12.6 |
|                                           | Kraken2        | 10                | 62 | 0  | 0.14 | 1.00 | 0.24 | 0.17 | 59.7 |      |
|                                           | Bracken        | 10                | 96 | 0  | 0.09 | 1.00 | 0.17 | 0.11 | 80.0 |      |
|                                           | Centrifuge-h22 | 8                 | 27 | 2  | 0.23 | 0.80 | 0.36 | 0.27 | 81.7 |      |
|                                           | MetaPhlan3     | 7                 | 1  | 3  | 0.88 | 0.70 | 0.78 | 0.83 | 82.7 |      |
|                                           | mOTUs          | 7                 | 0  | 3  | 1.00 | 0.70 | 0.82 | 0.92 | 55.2 |      |
|                                           | Sourmash-k31   | 10                | 2  | 0  | 0.83 | 1.00 | 0.91 | 0.86 | 99.3 |      |
|                                           | Sourmash-k51   | 9                 | 2  | 1  | 0.82 | 0.90 | 0.86 | 0.83 | 82.3 |      |

\*Two species were unavailable in several reference databases for HiFi Zymo D6331, and the set of taxa was adjusted to 15 species to calculate the species metrics (see methods).
